# Supplementary material for: Easy and direct conversion of tosylates and mesylates into nitroalkanes
Source: publisher site journal article supplement (doi:10.3762/bjoc.9.58), 2013-03-14

# Supporting Information

for

## Easy and direct conversion of tosylates and mesylates into nitroalkanes

Alessandro Palmieri, Serena Gabrielli and Roberto Ballini\*

Address: “Green Chemistry Group”, School of Science and Technology, Chemistry Division, University of Camerino, Via S. Agostino 1, 62032  
Camerino (MC), Italy

Email: Roberto Ballini - roberto.ballini@unicam.it

\* Corresponding author

**Copy of  $^1\text{H}$  and  $^{13}\text{C}$  NMR spectra of synthesized compounds**

$^1\text{H}$  NMR - Compound **2a**.

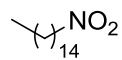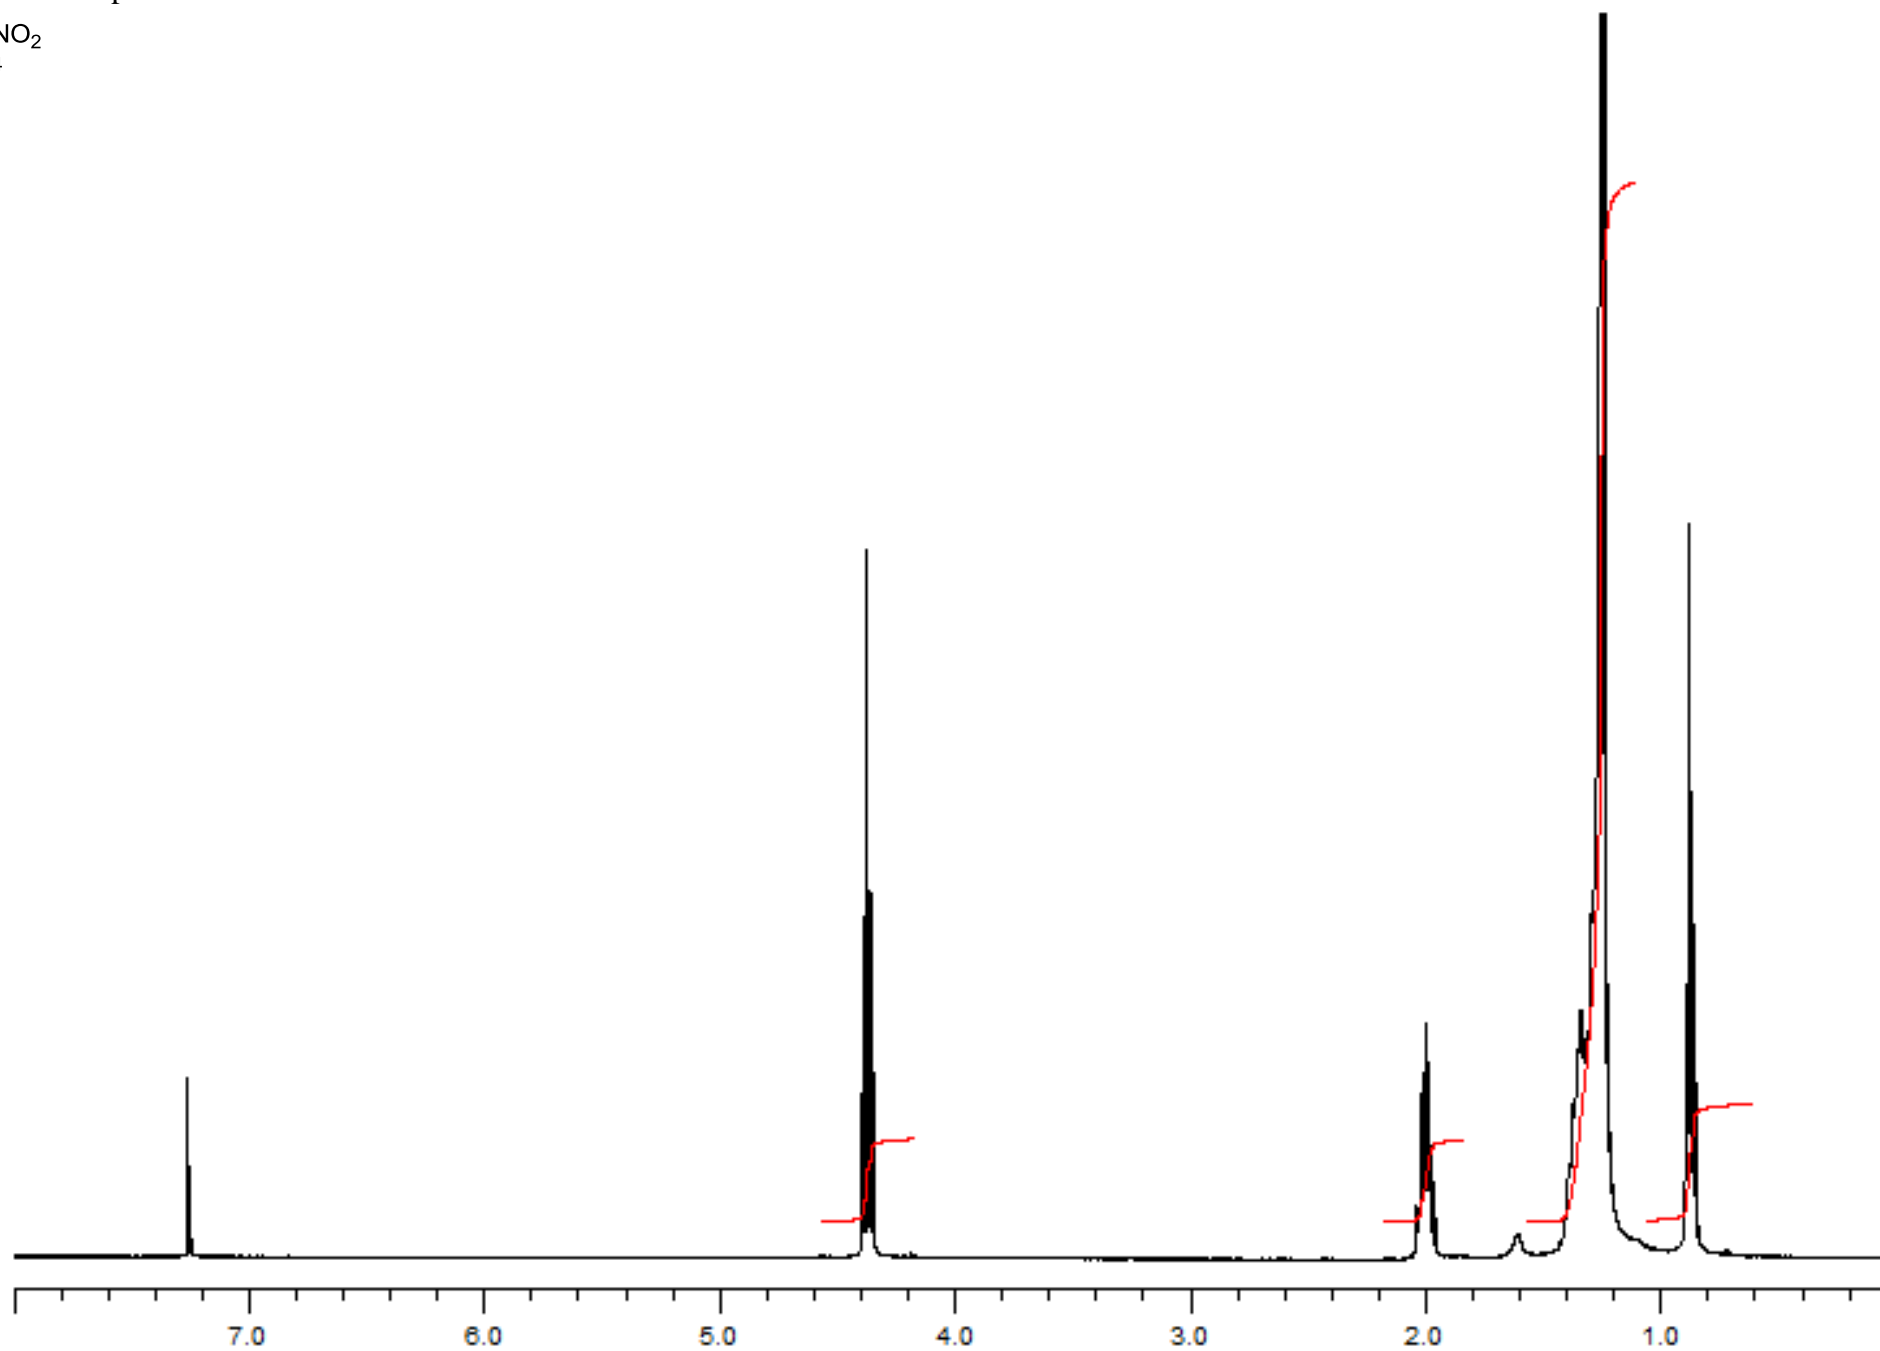

$^{13}\text{C}$  NMR - Compound **2a**.

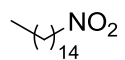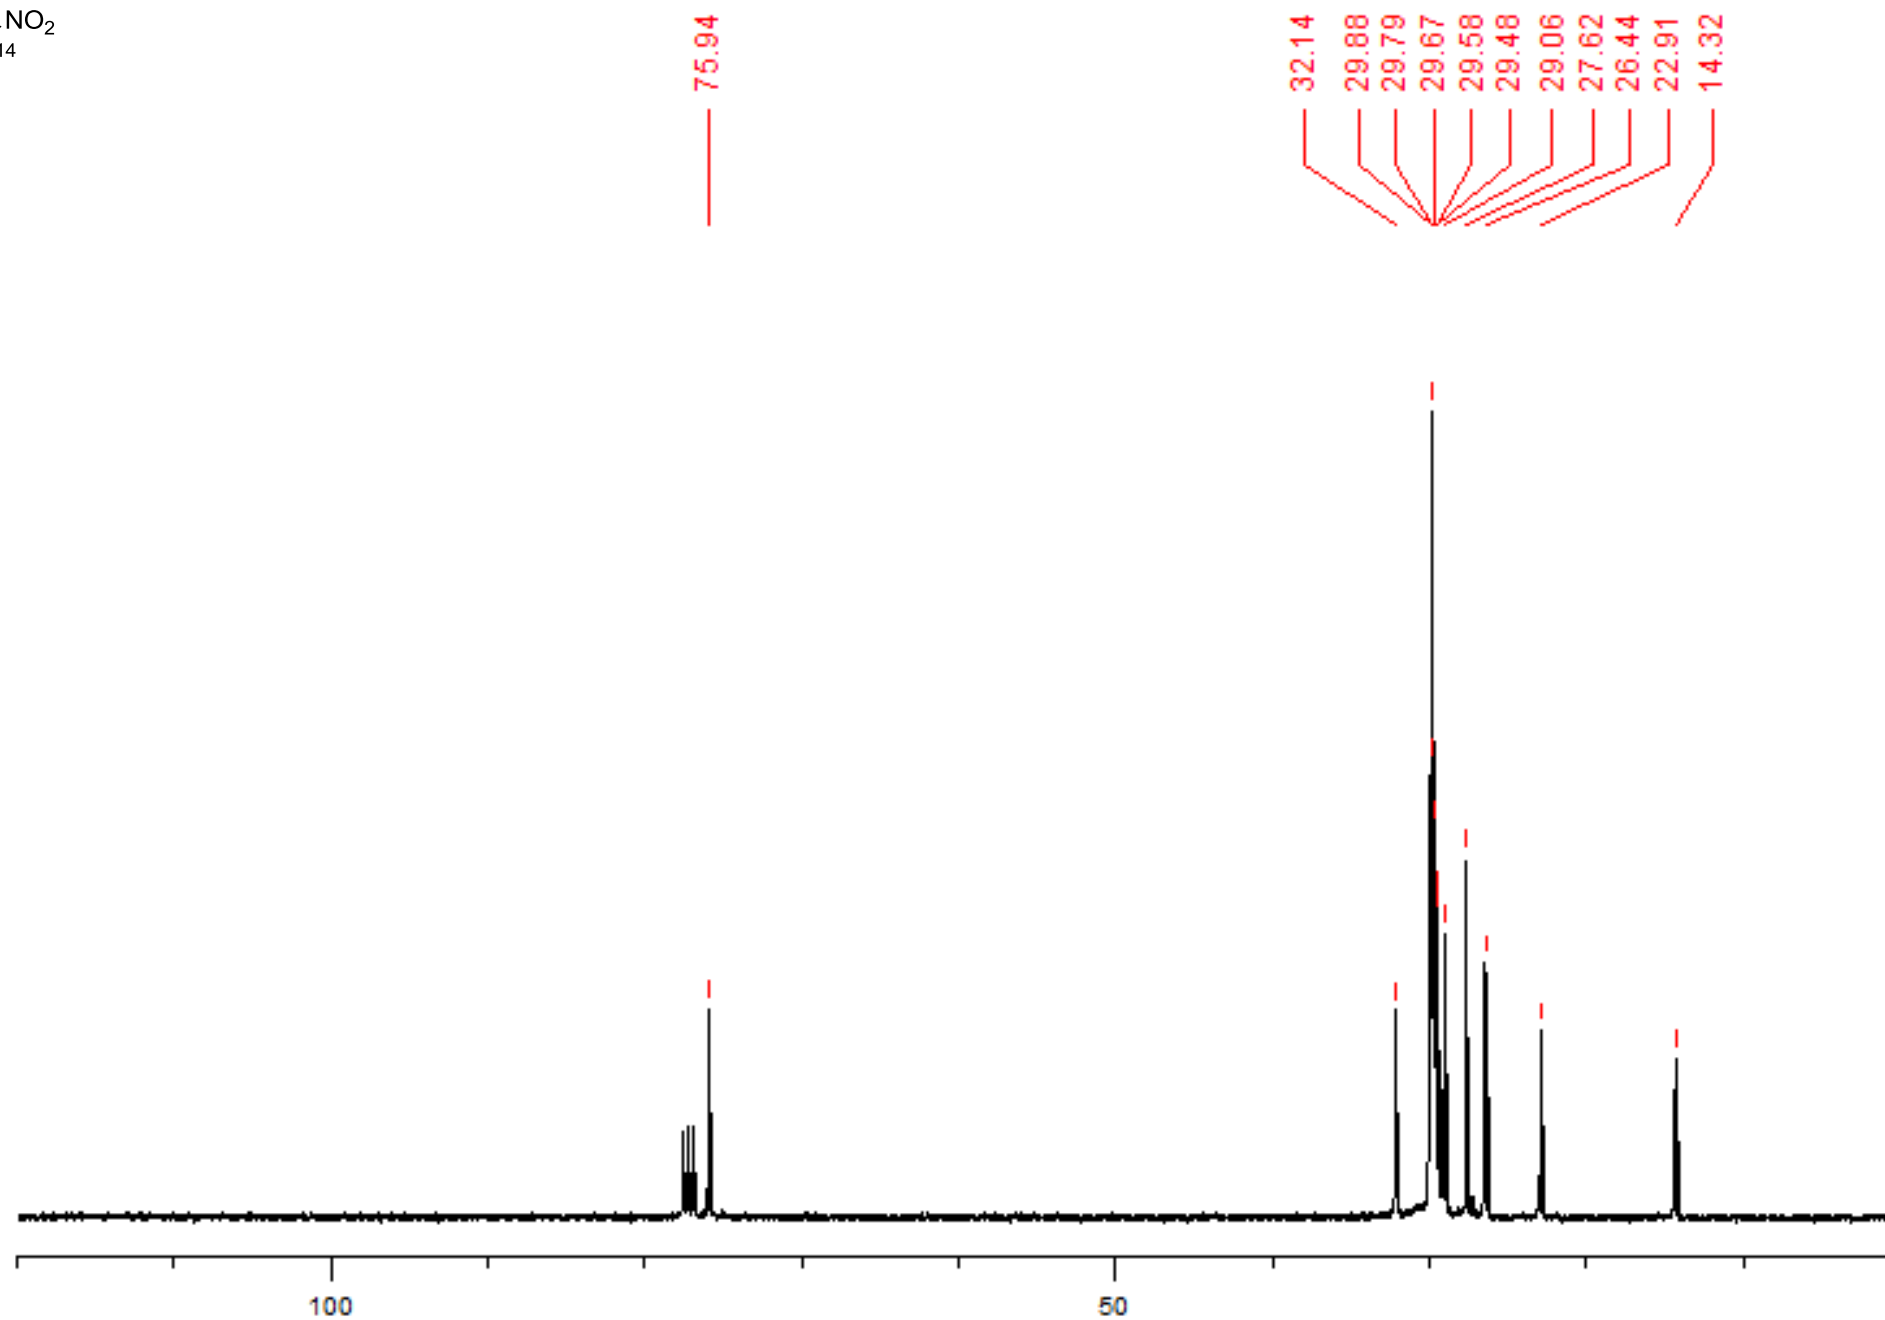

$^1\text{H}$  NMR - Compound **2b**.

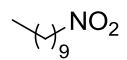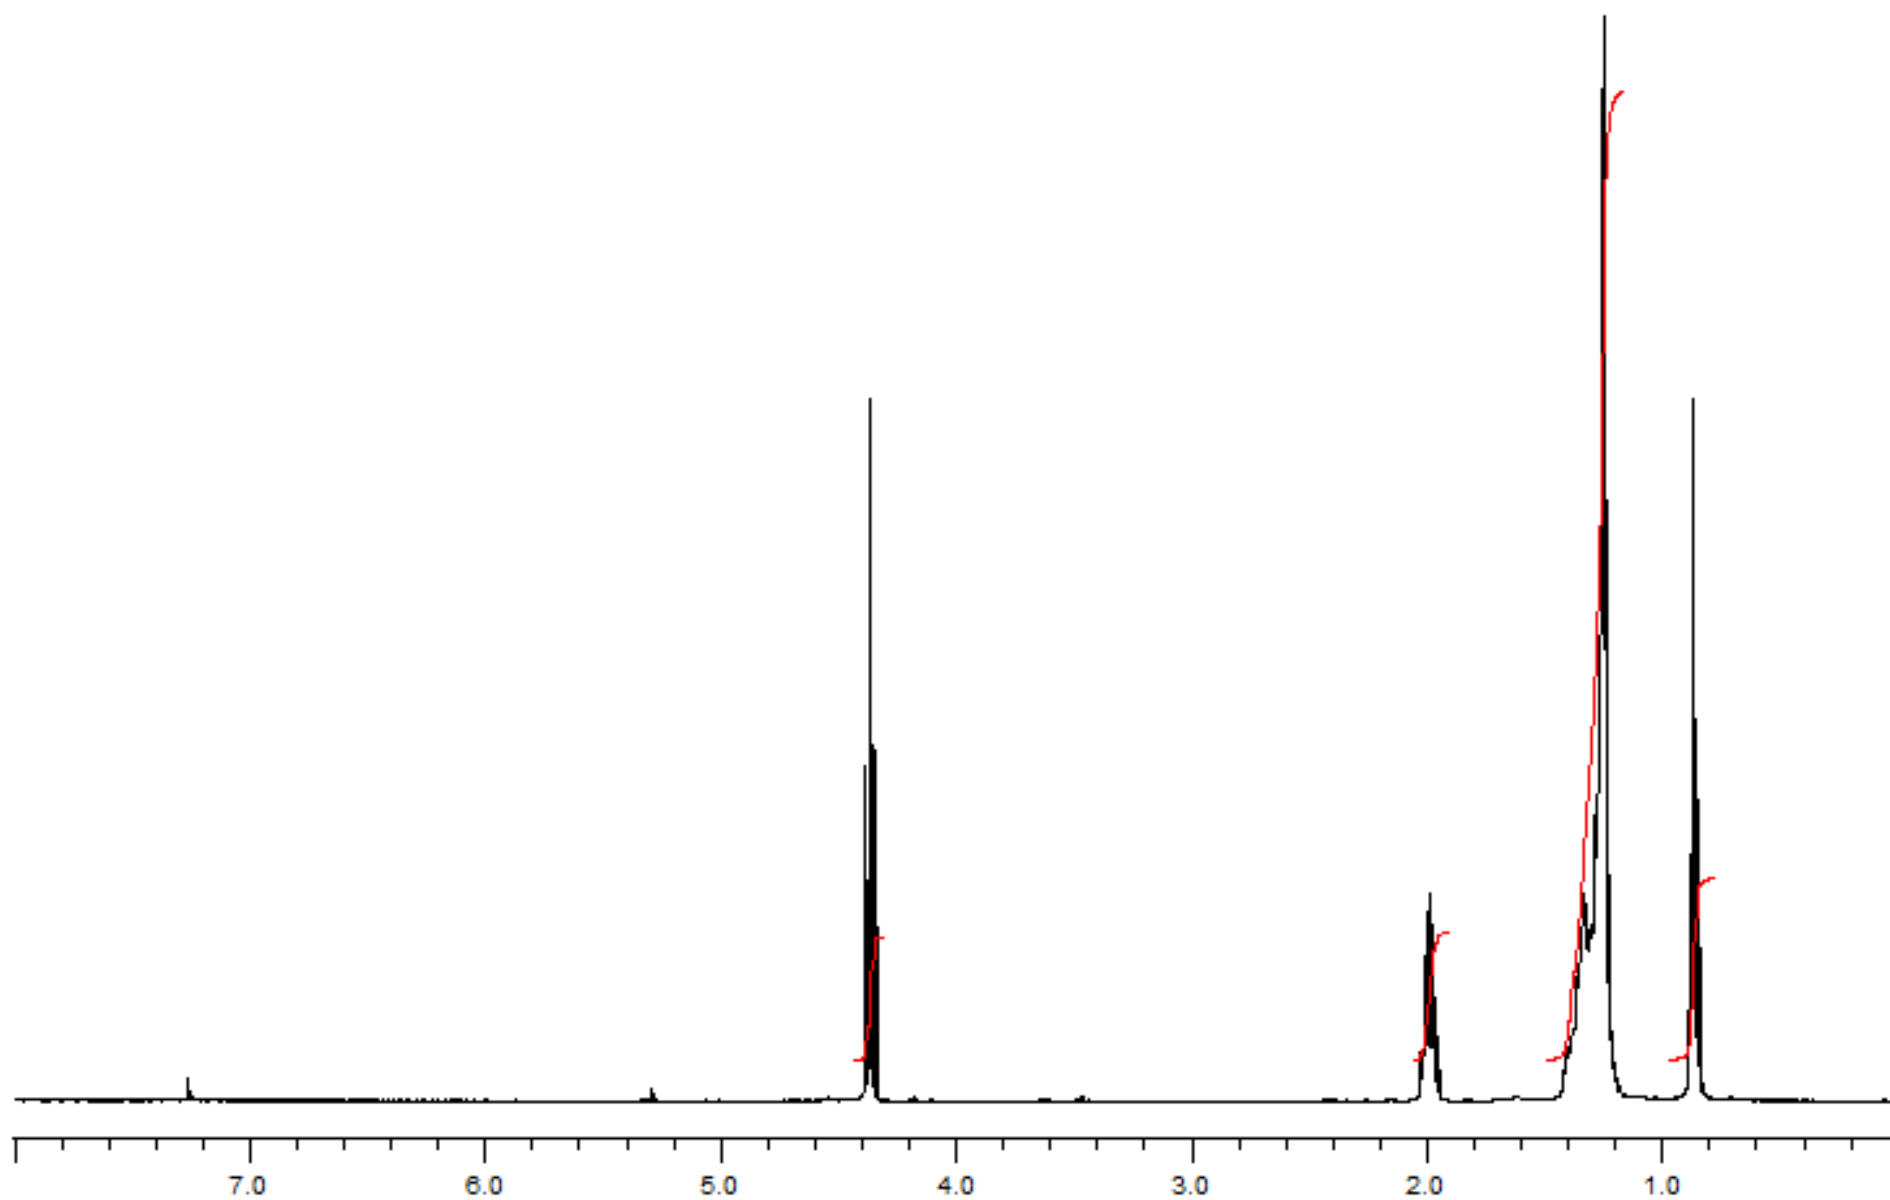

CCCCCCCCC[N+](=O)[O-]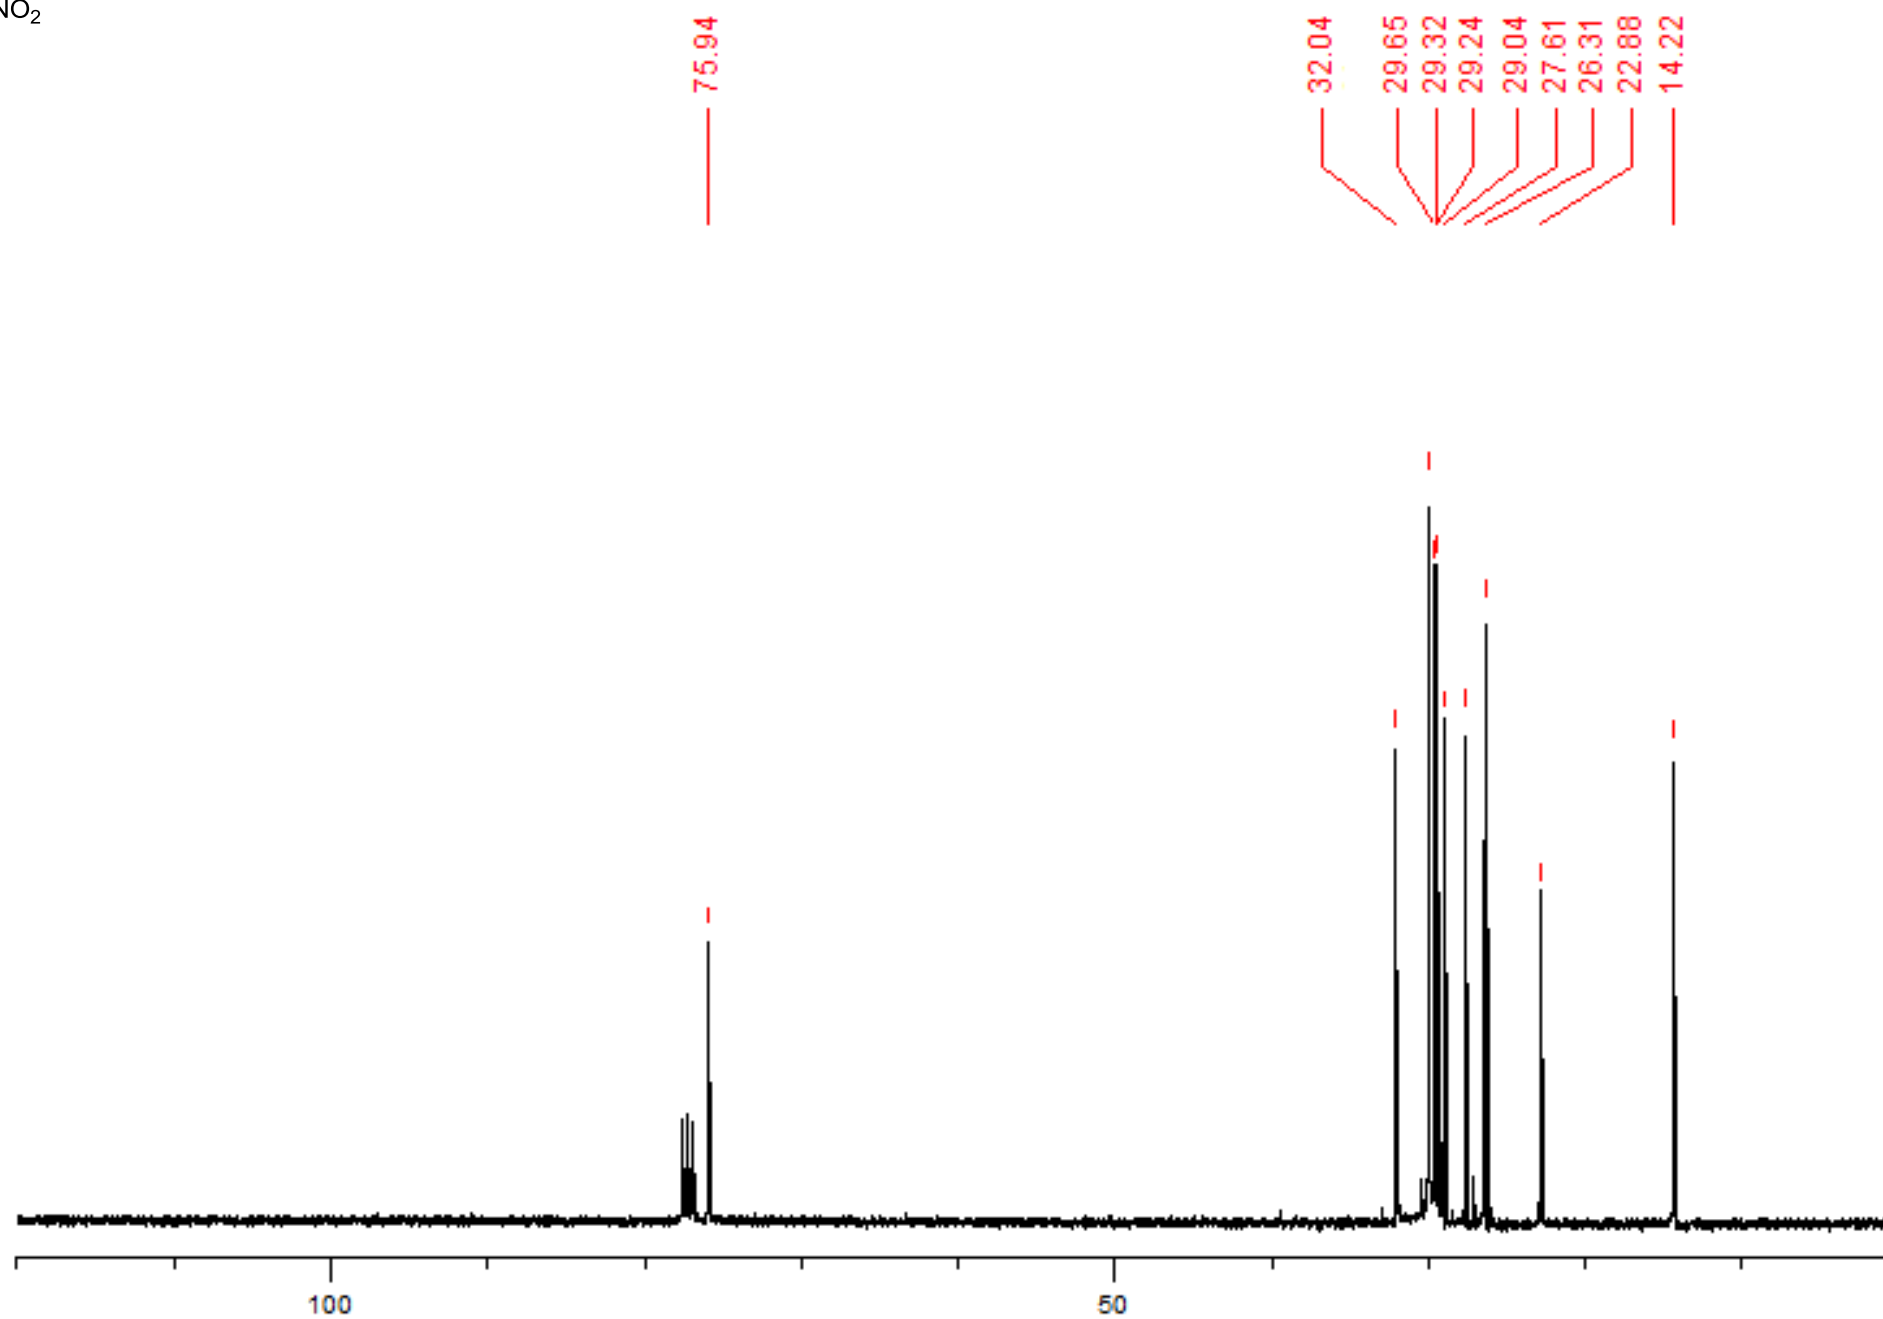

<sup>1</sup>H NMR - Compound **2c**.

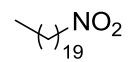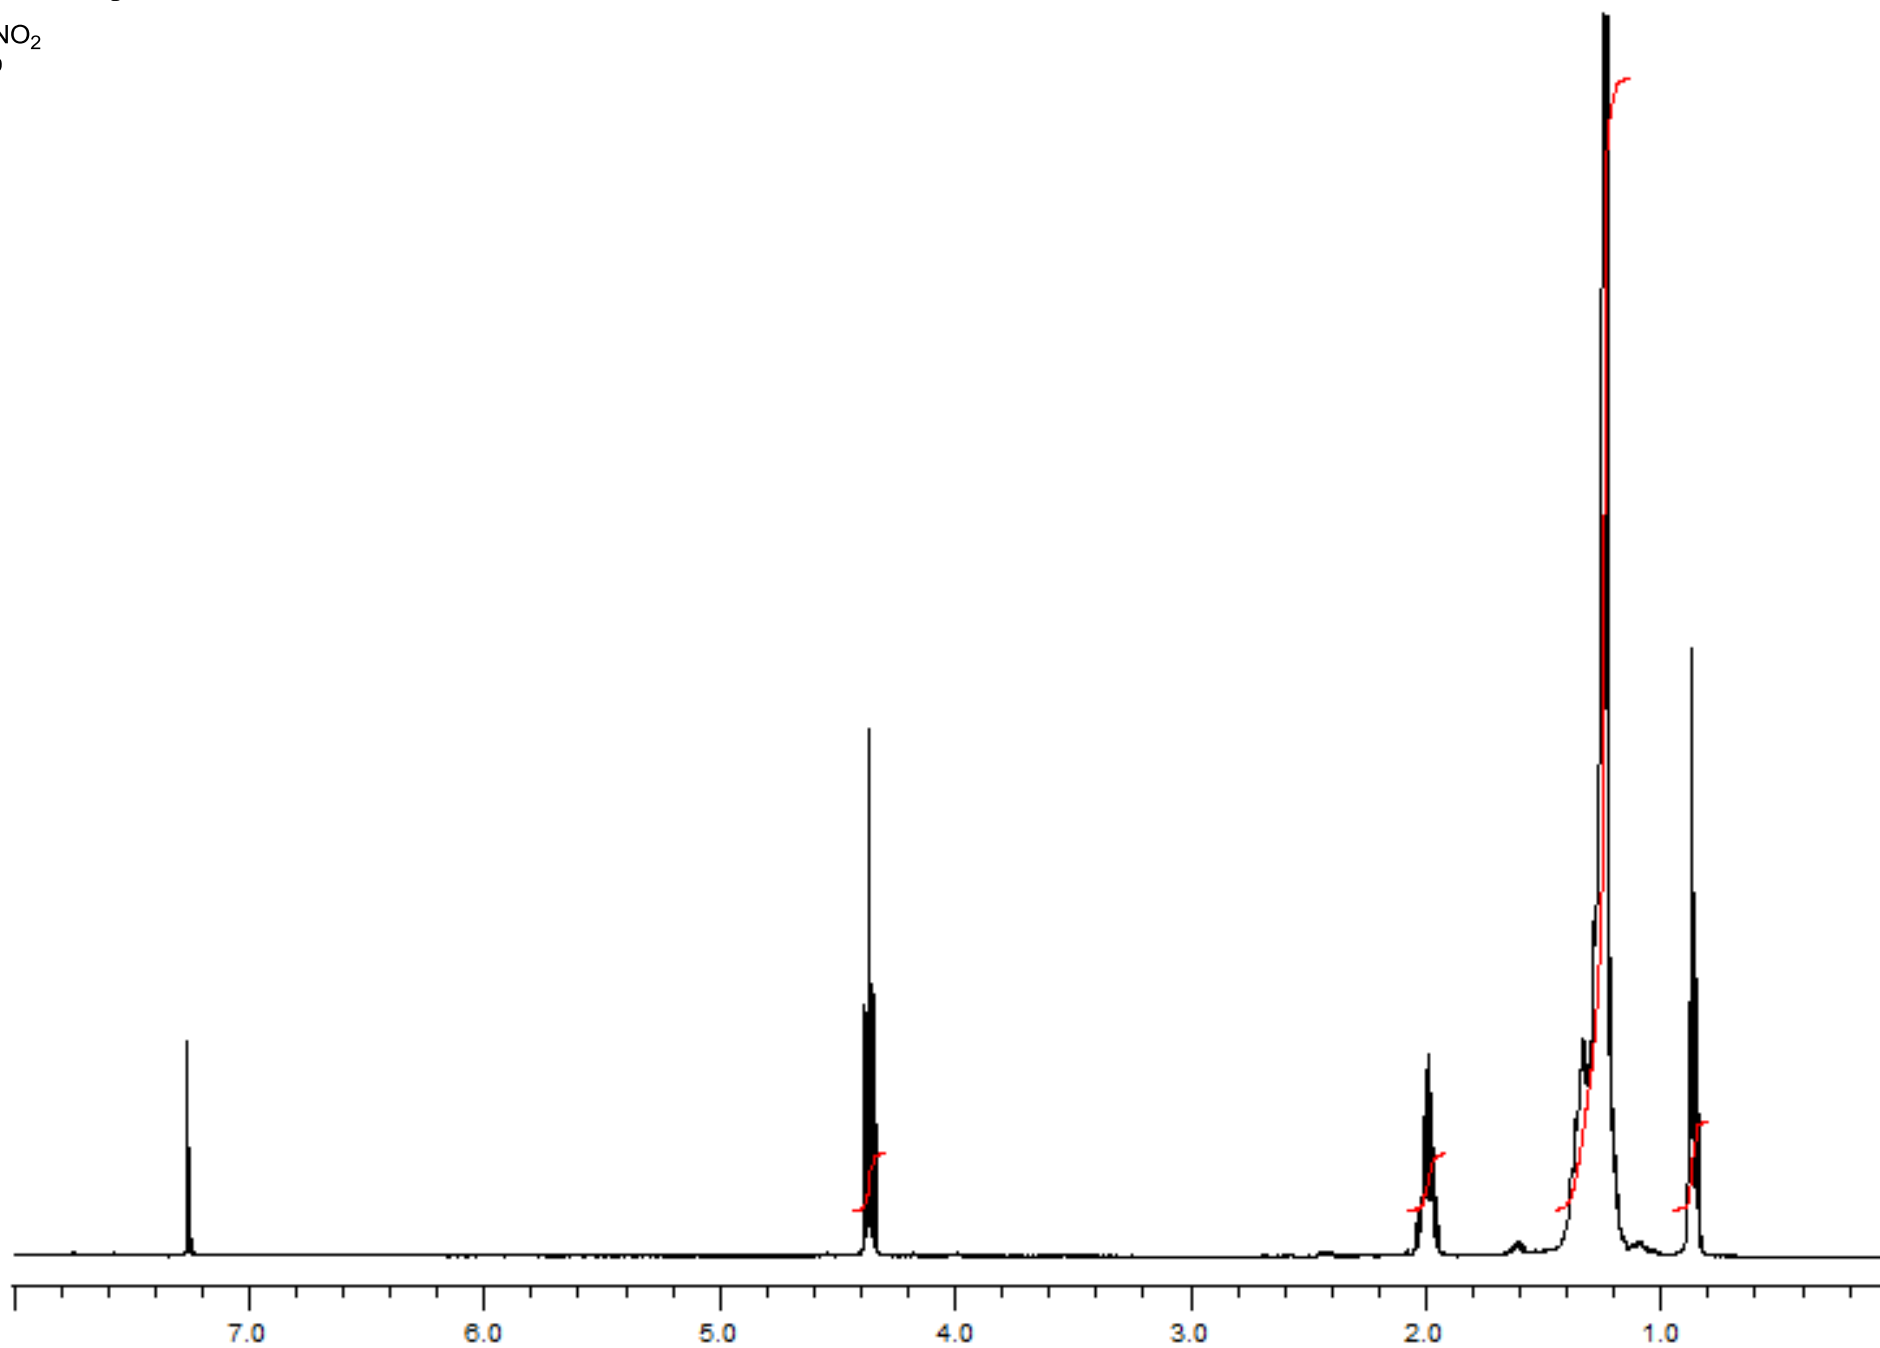

$^{13}\text{C}$  NMR - Compound **2c**.

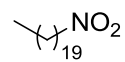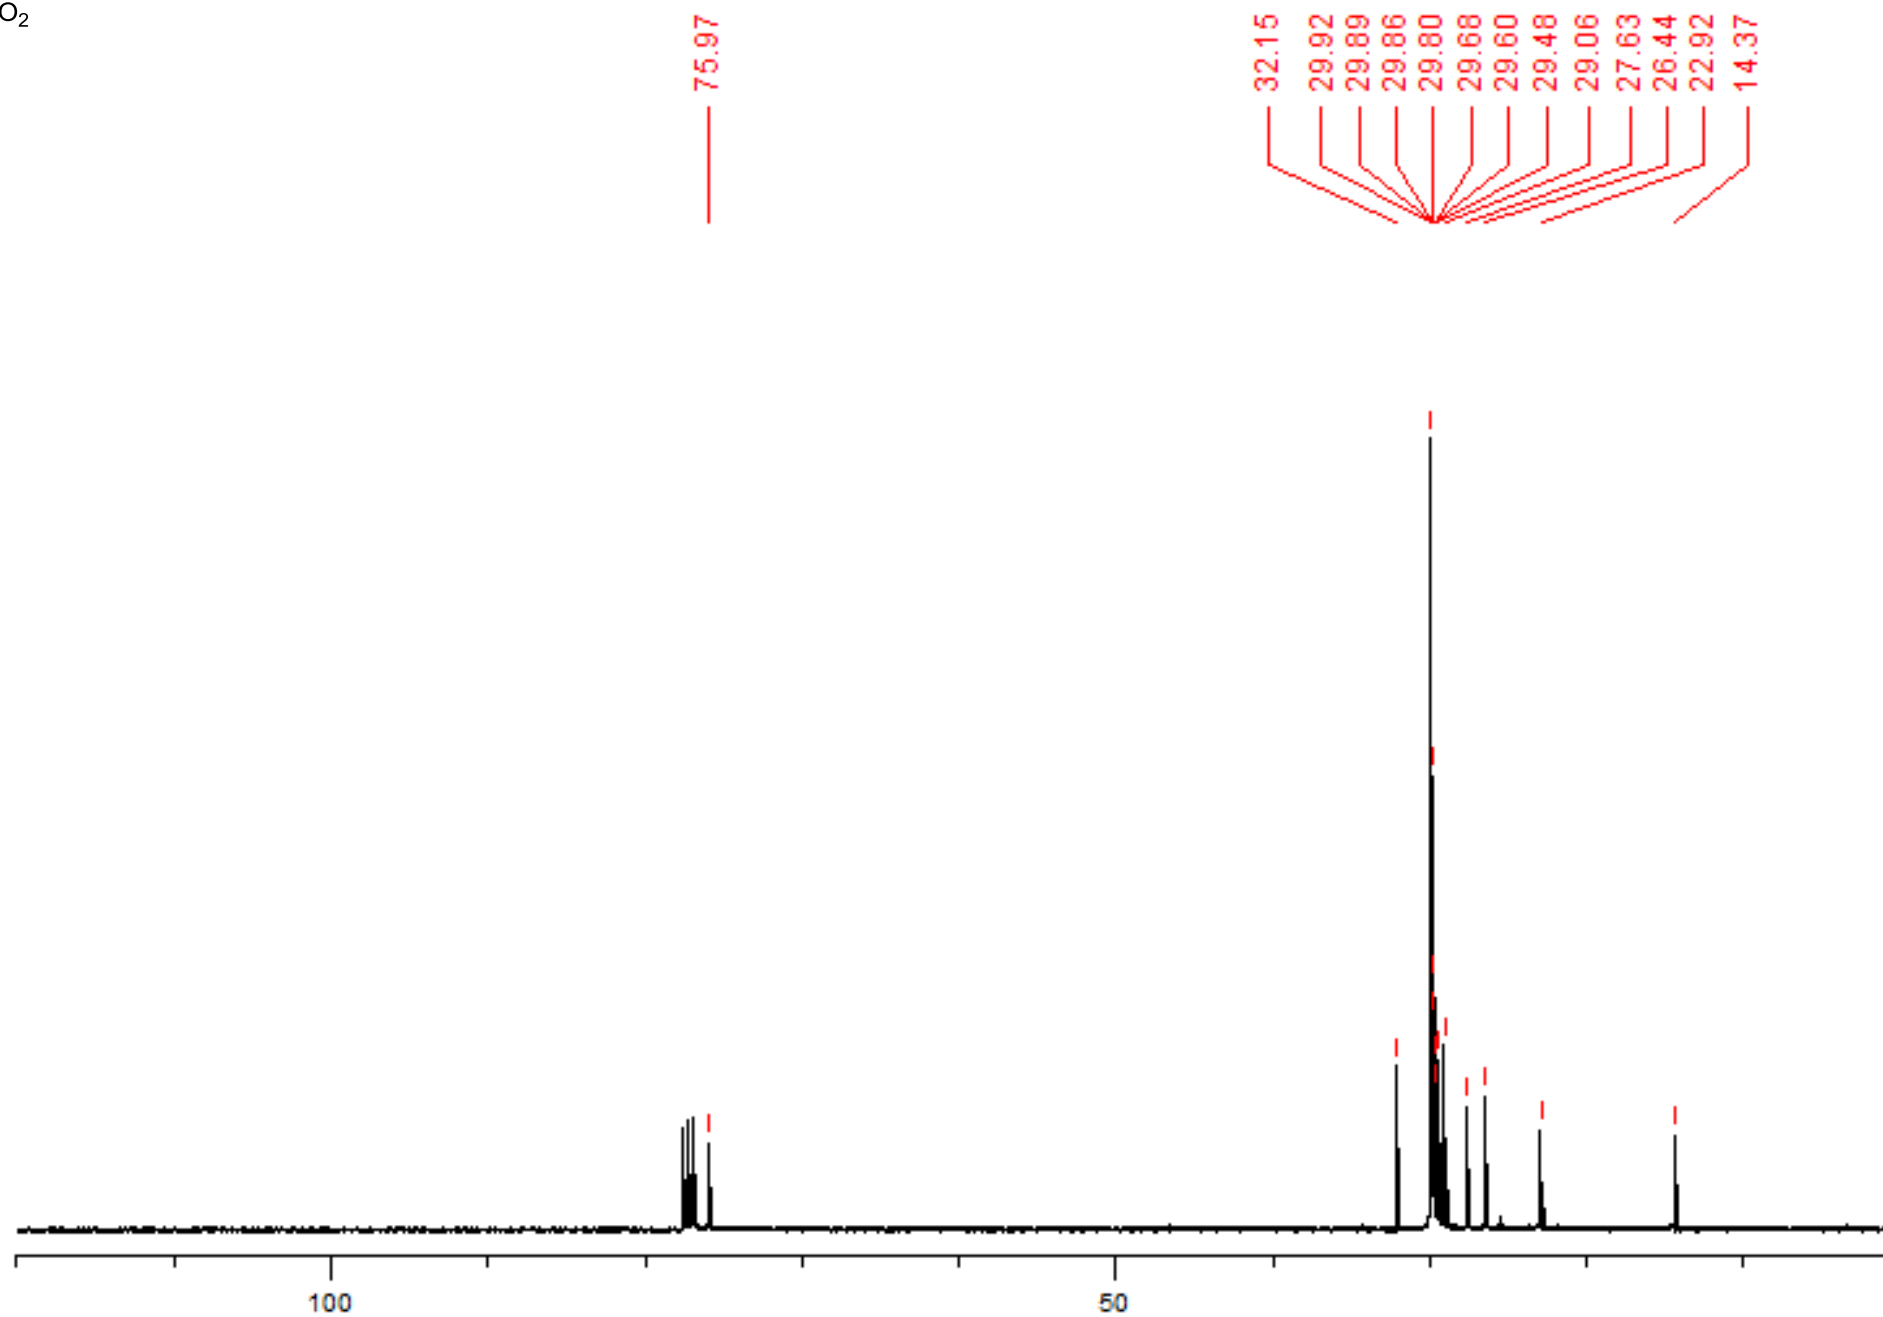

CCCCCCCC[N+](=O)[O-]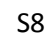



$^{13}\text{C}$  NMR - Compound **2d**.

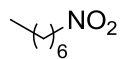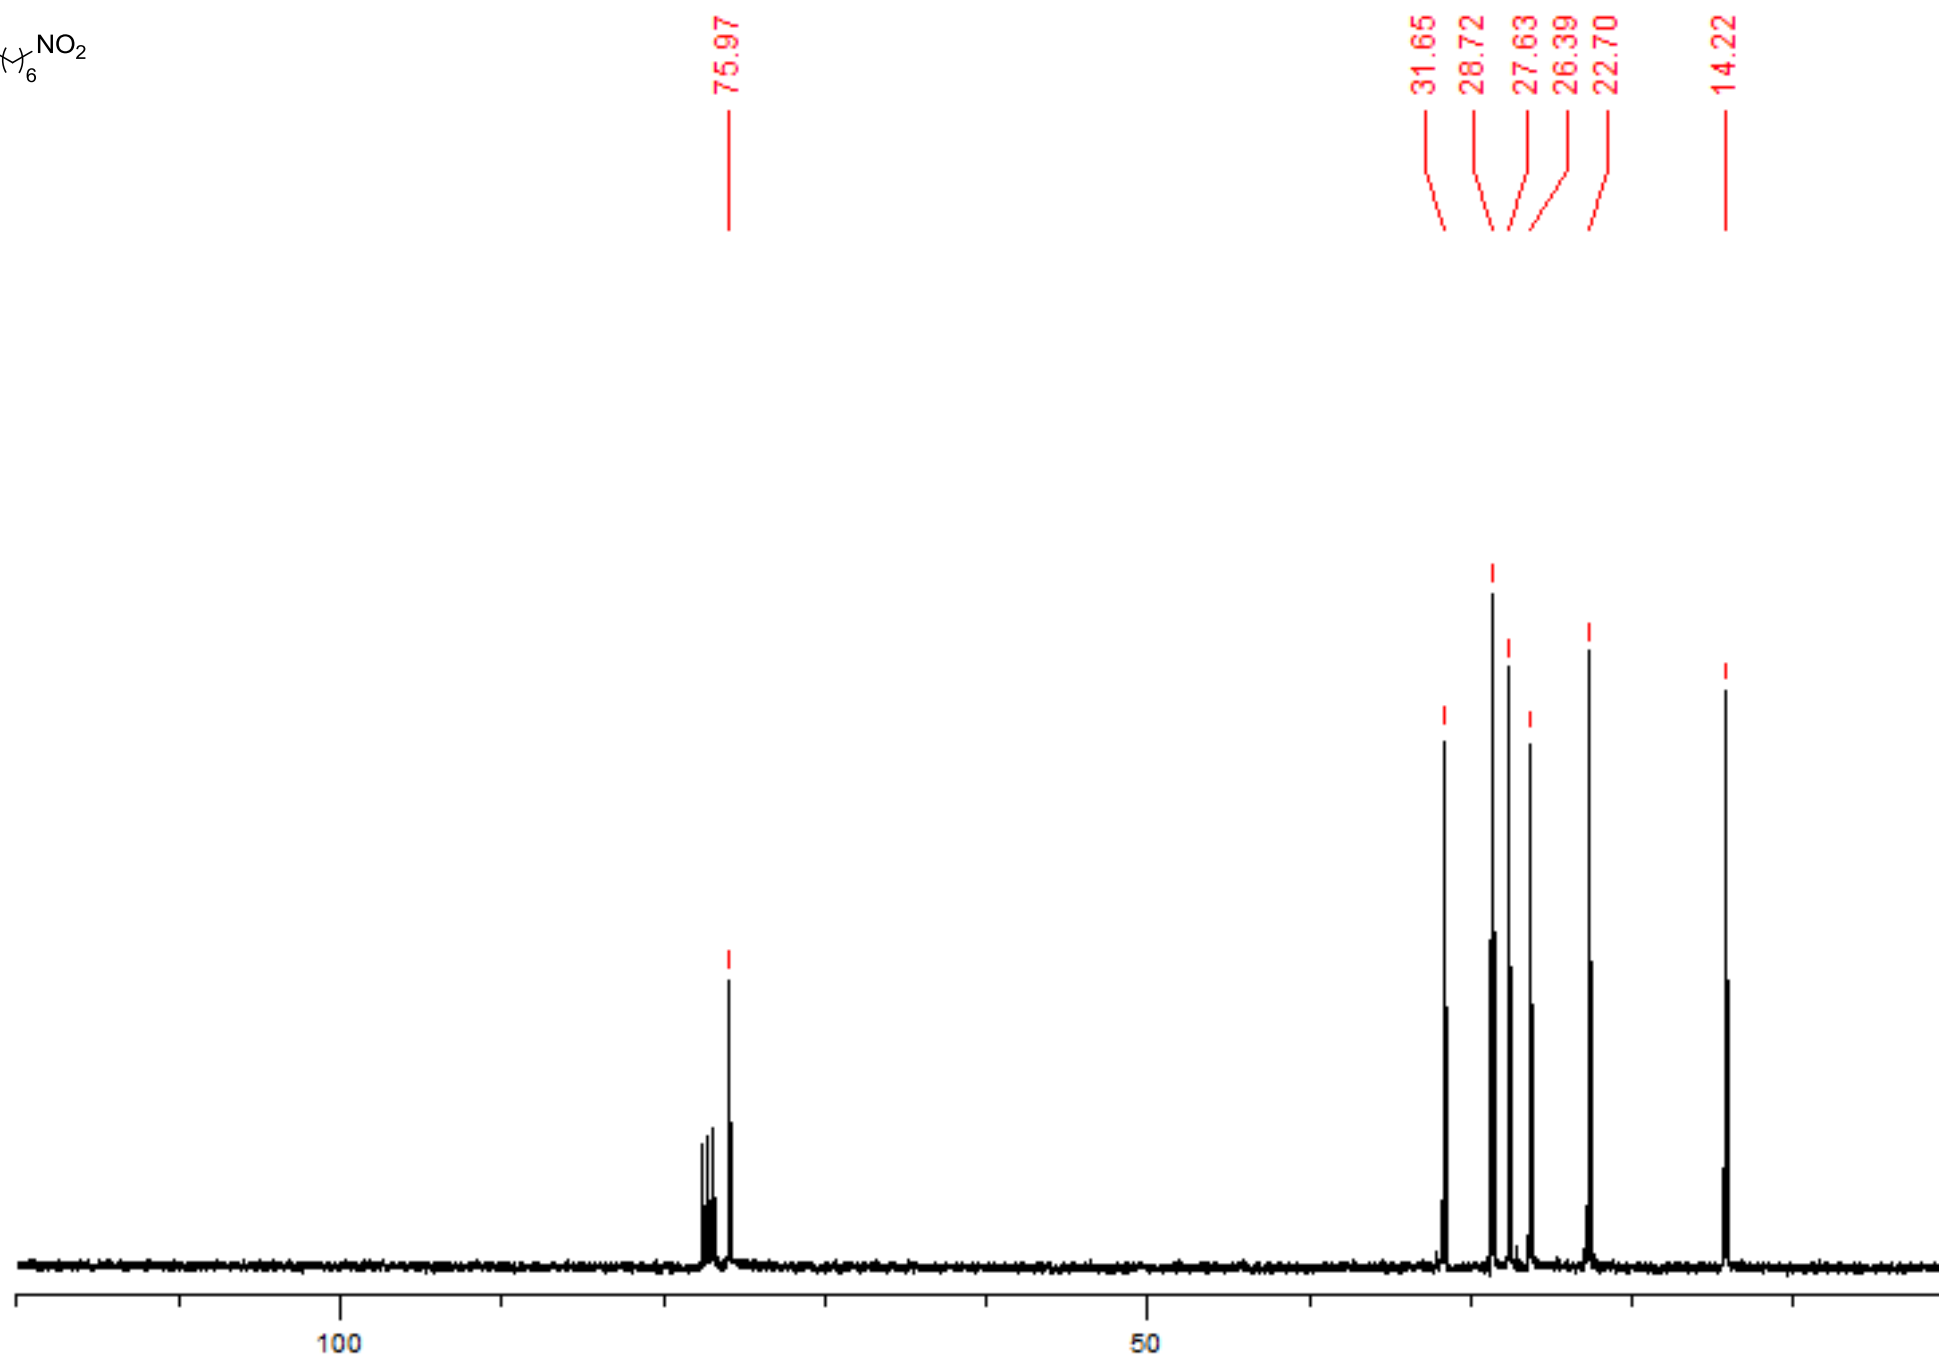

$^1\text{H}$  NMR - Compound **2e**.

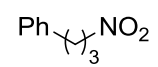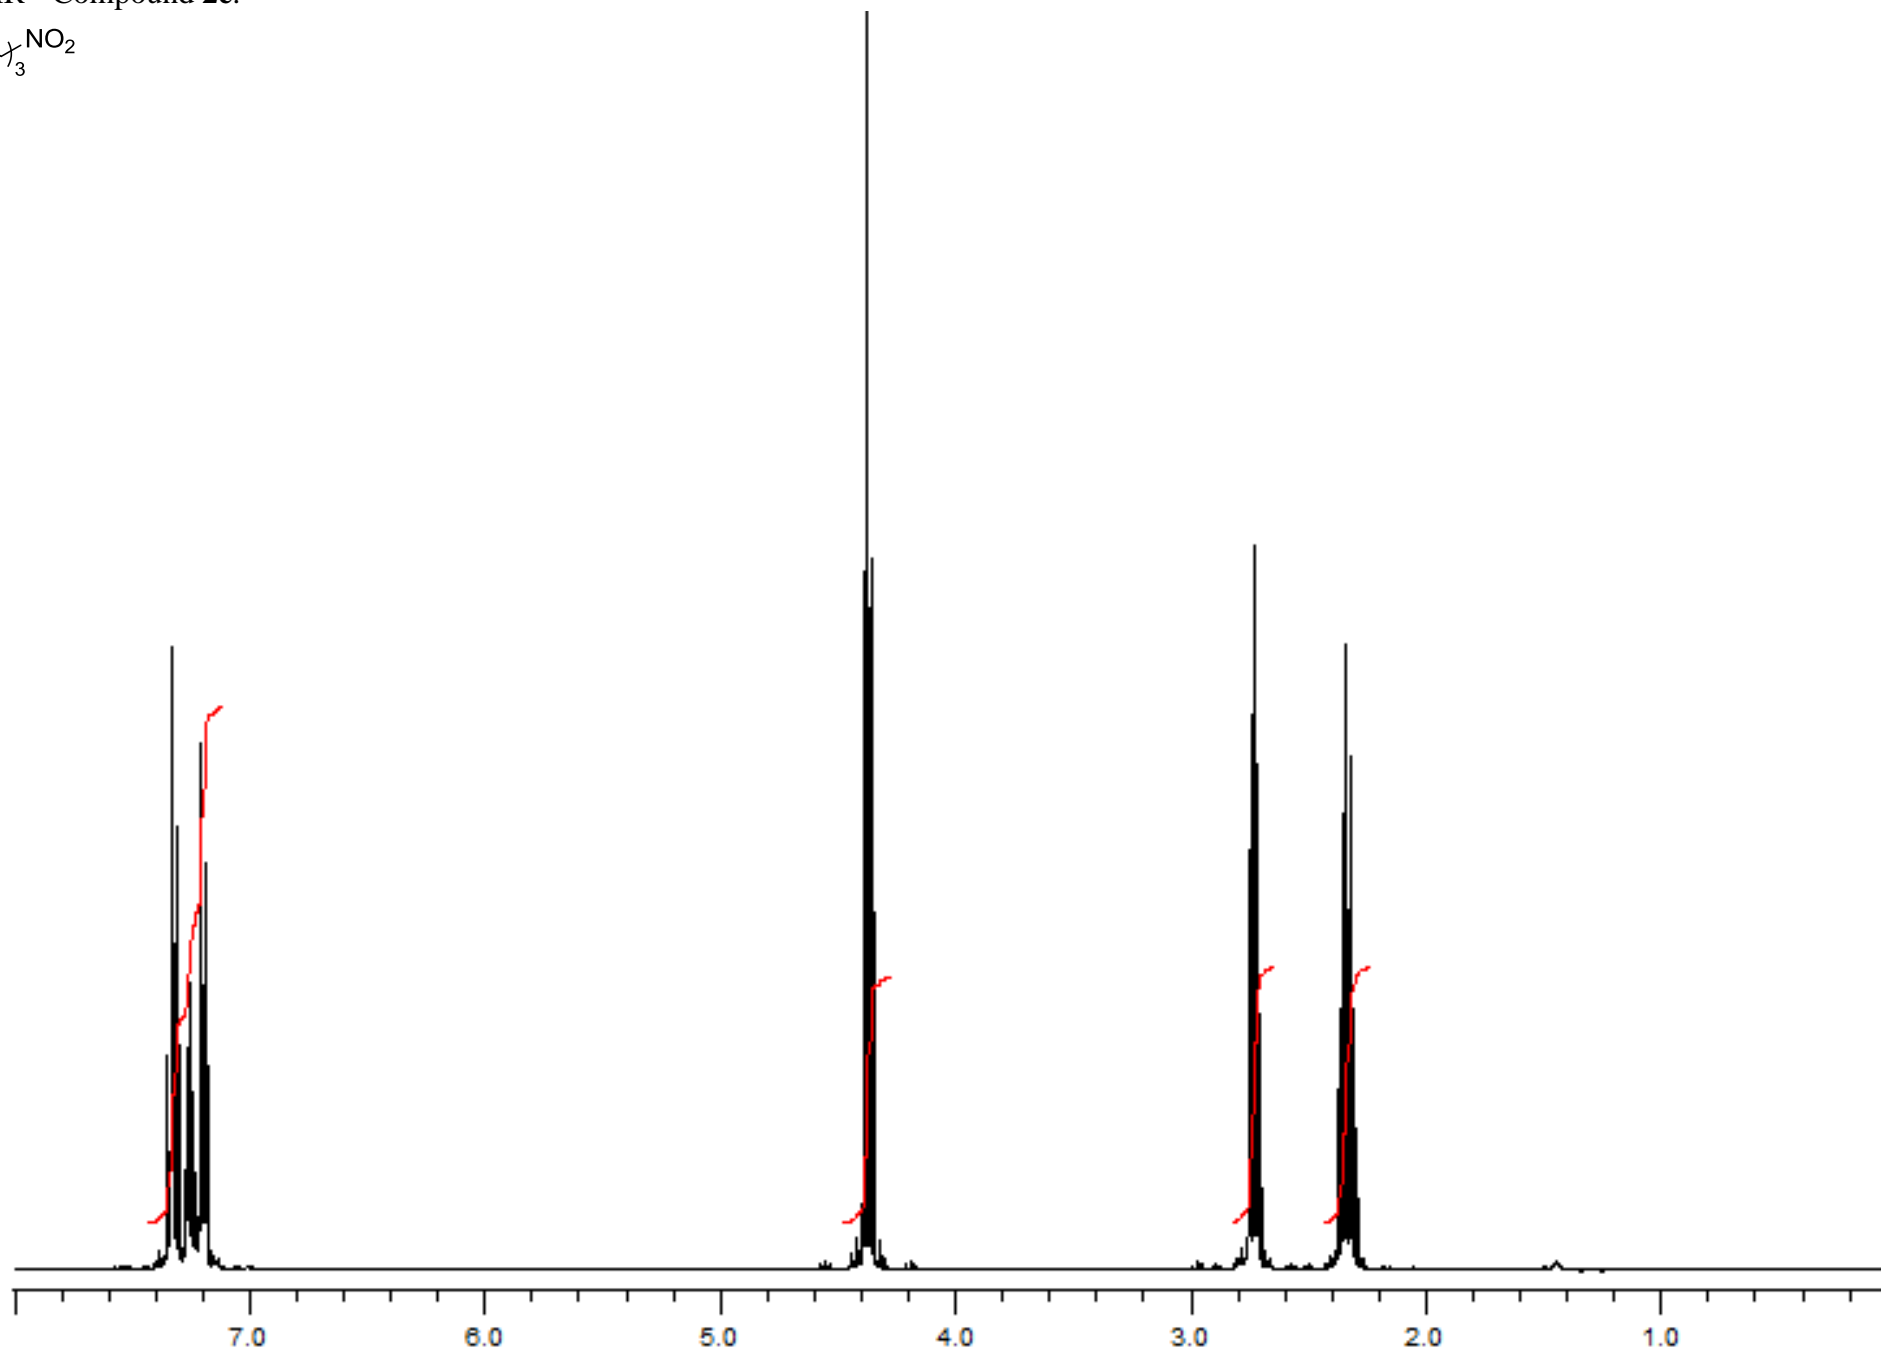

$^{13}\text{C}$  NMR - Compound **2e**.

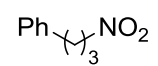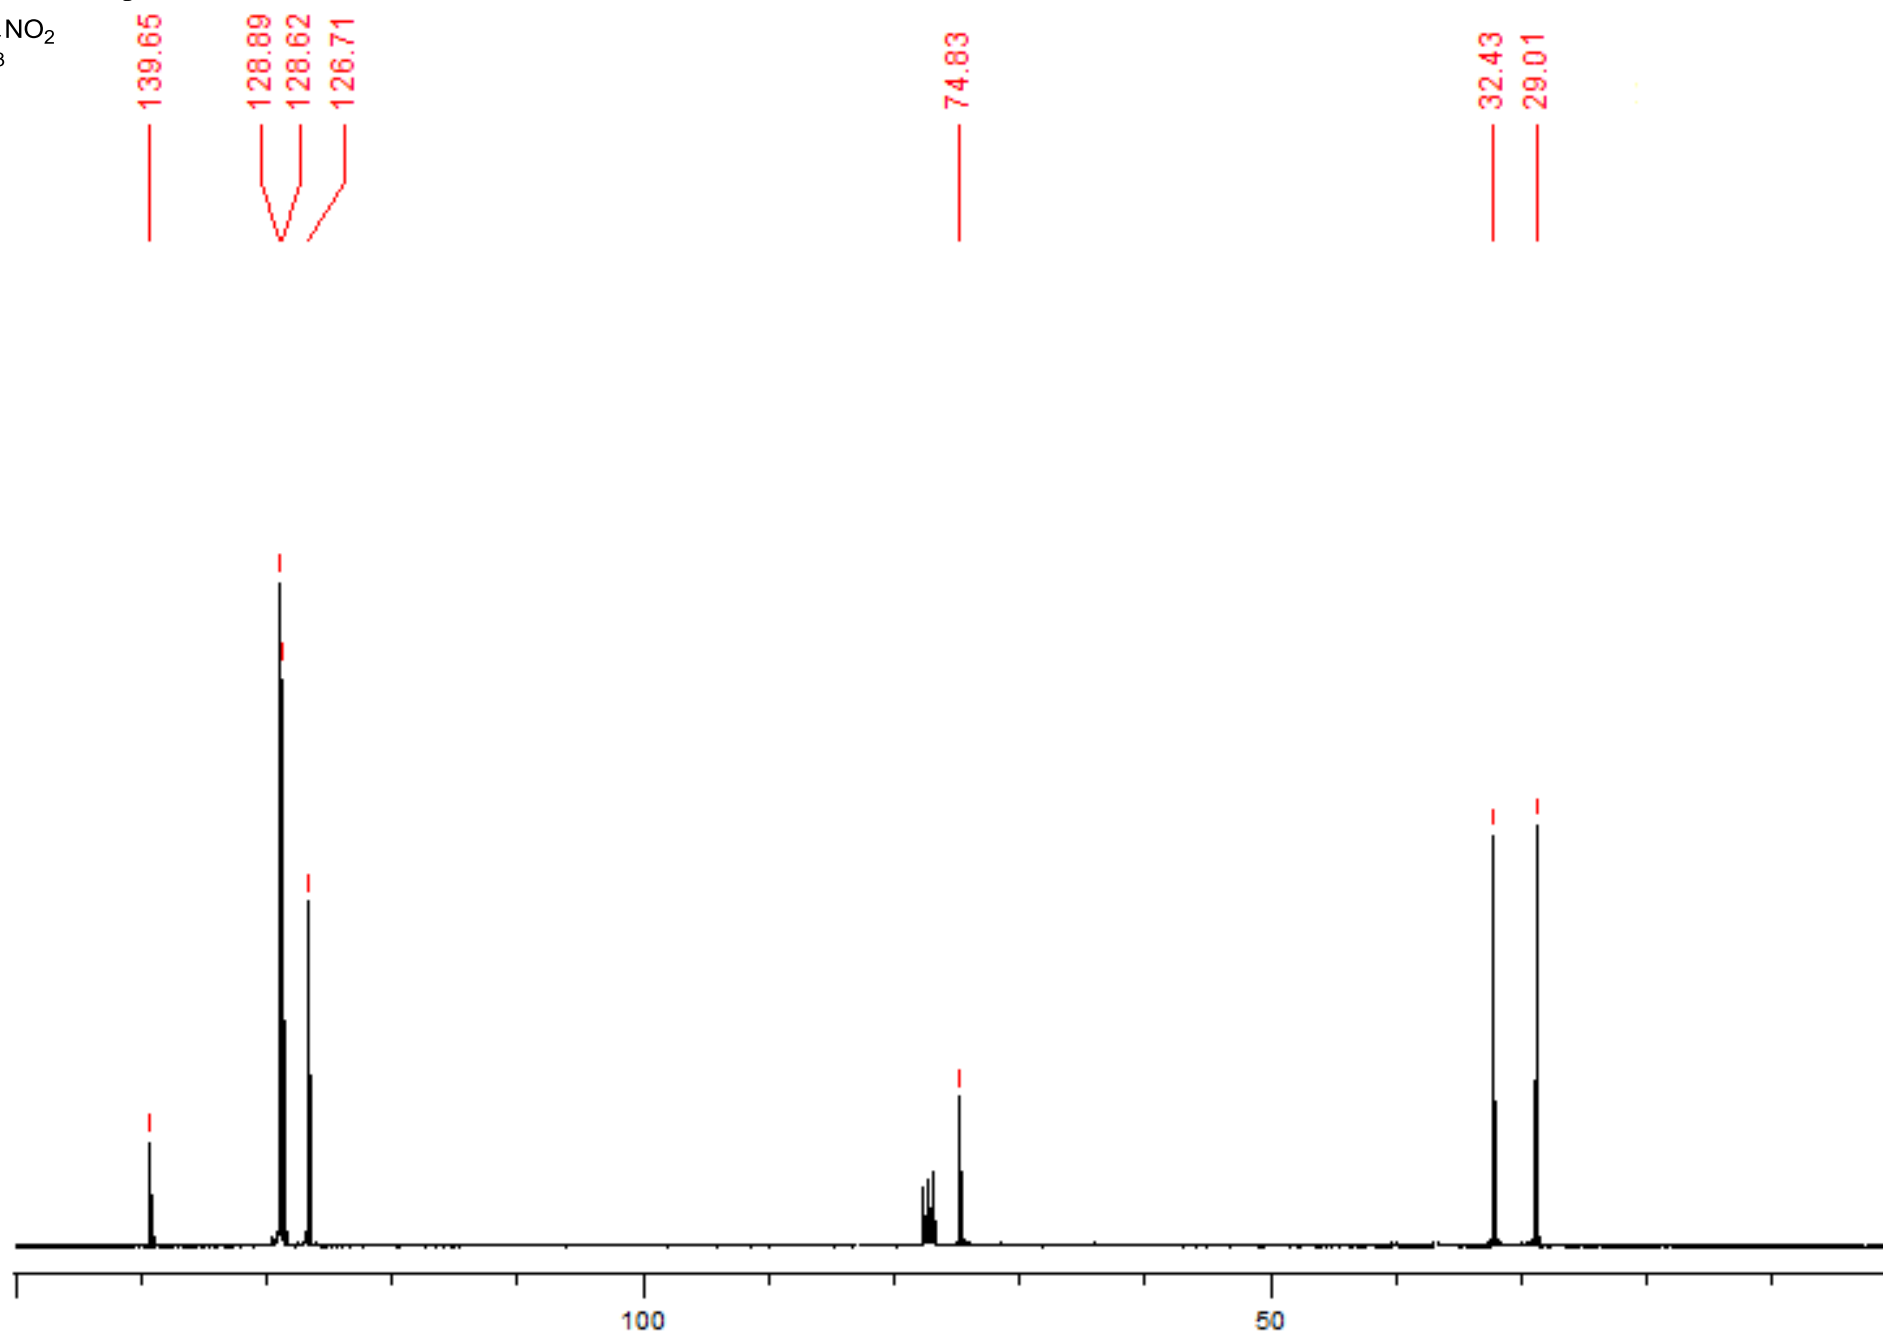

<sup>1</sup>H NMR - Compound **2f**.

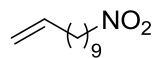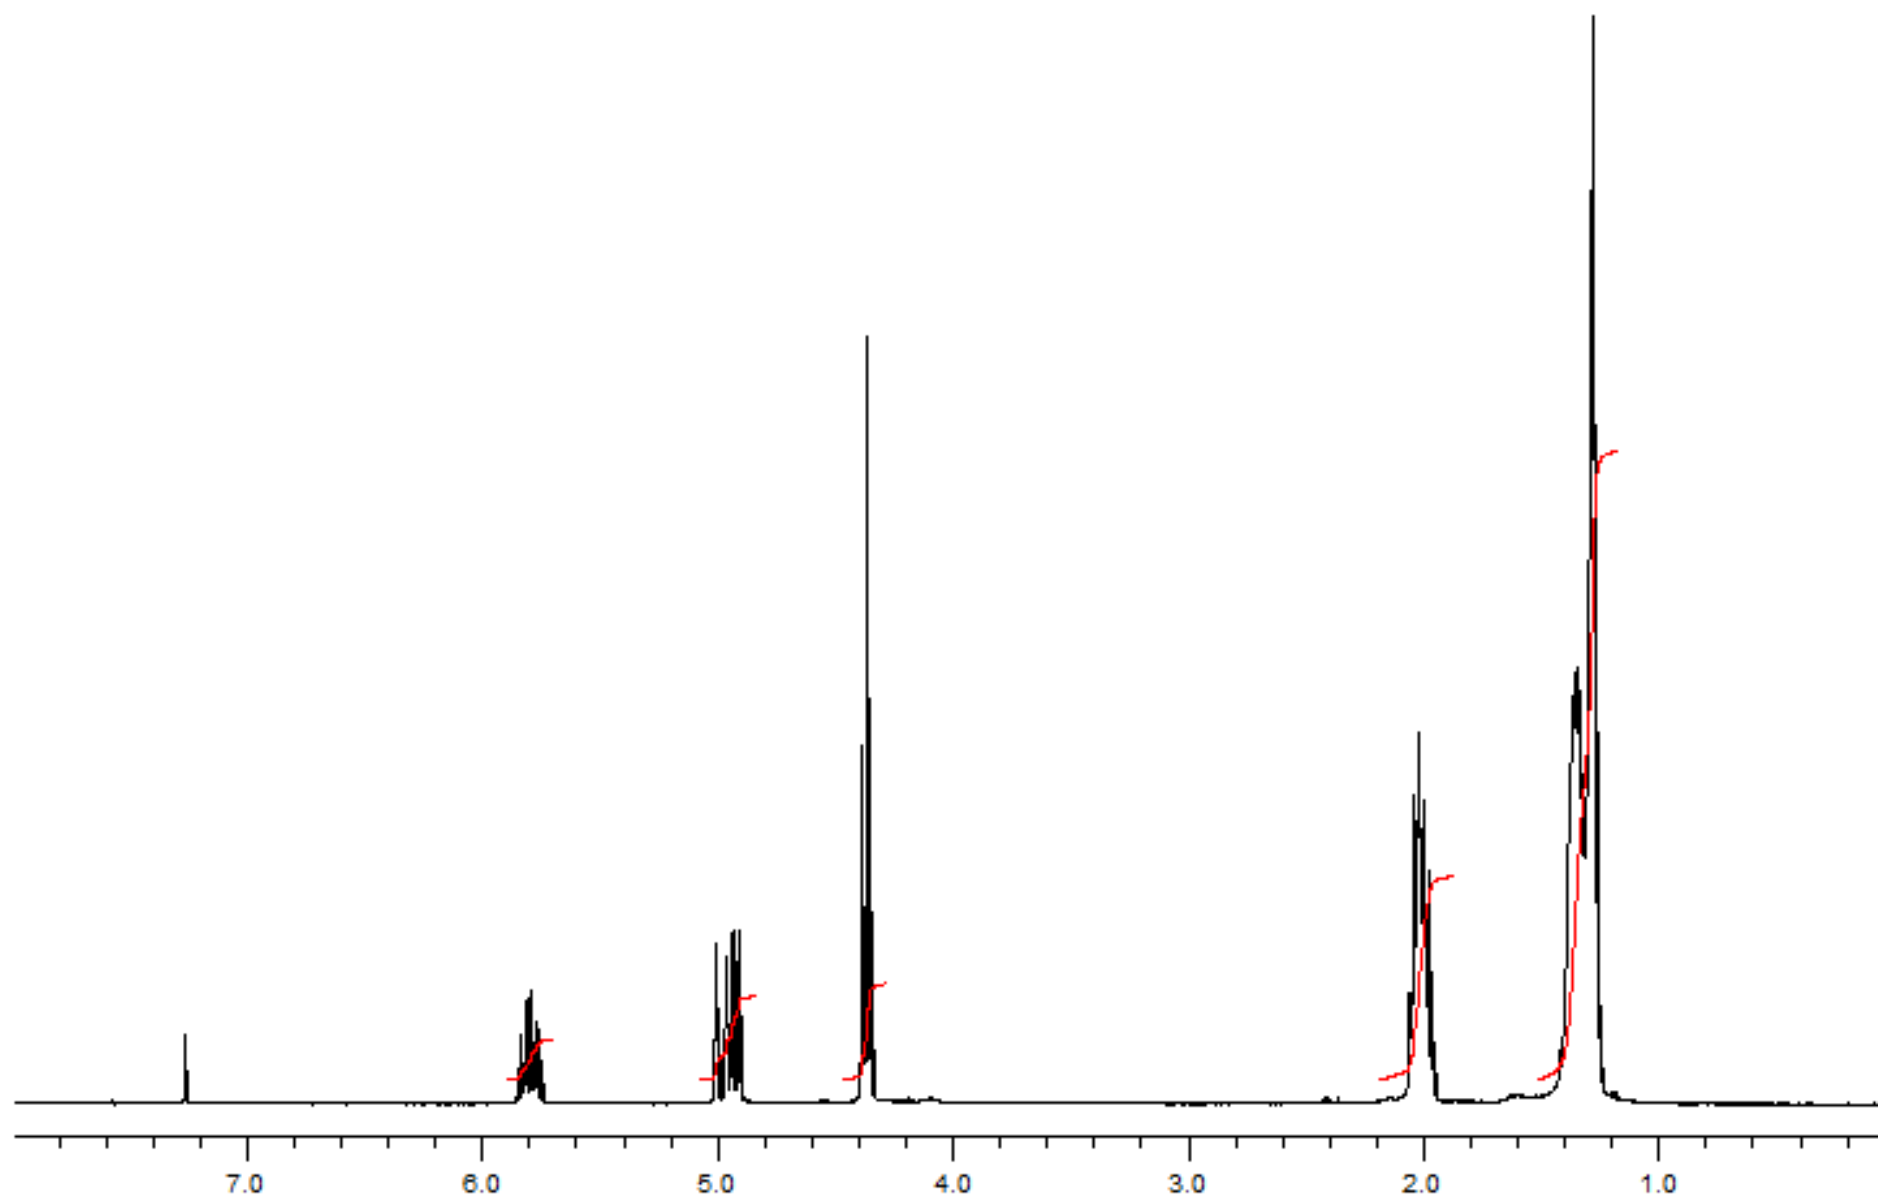

$^{13}\text{C}$  NMR - Compound **2f**.

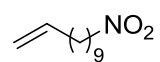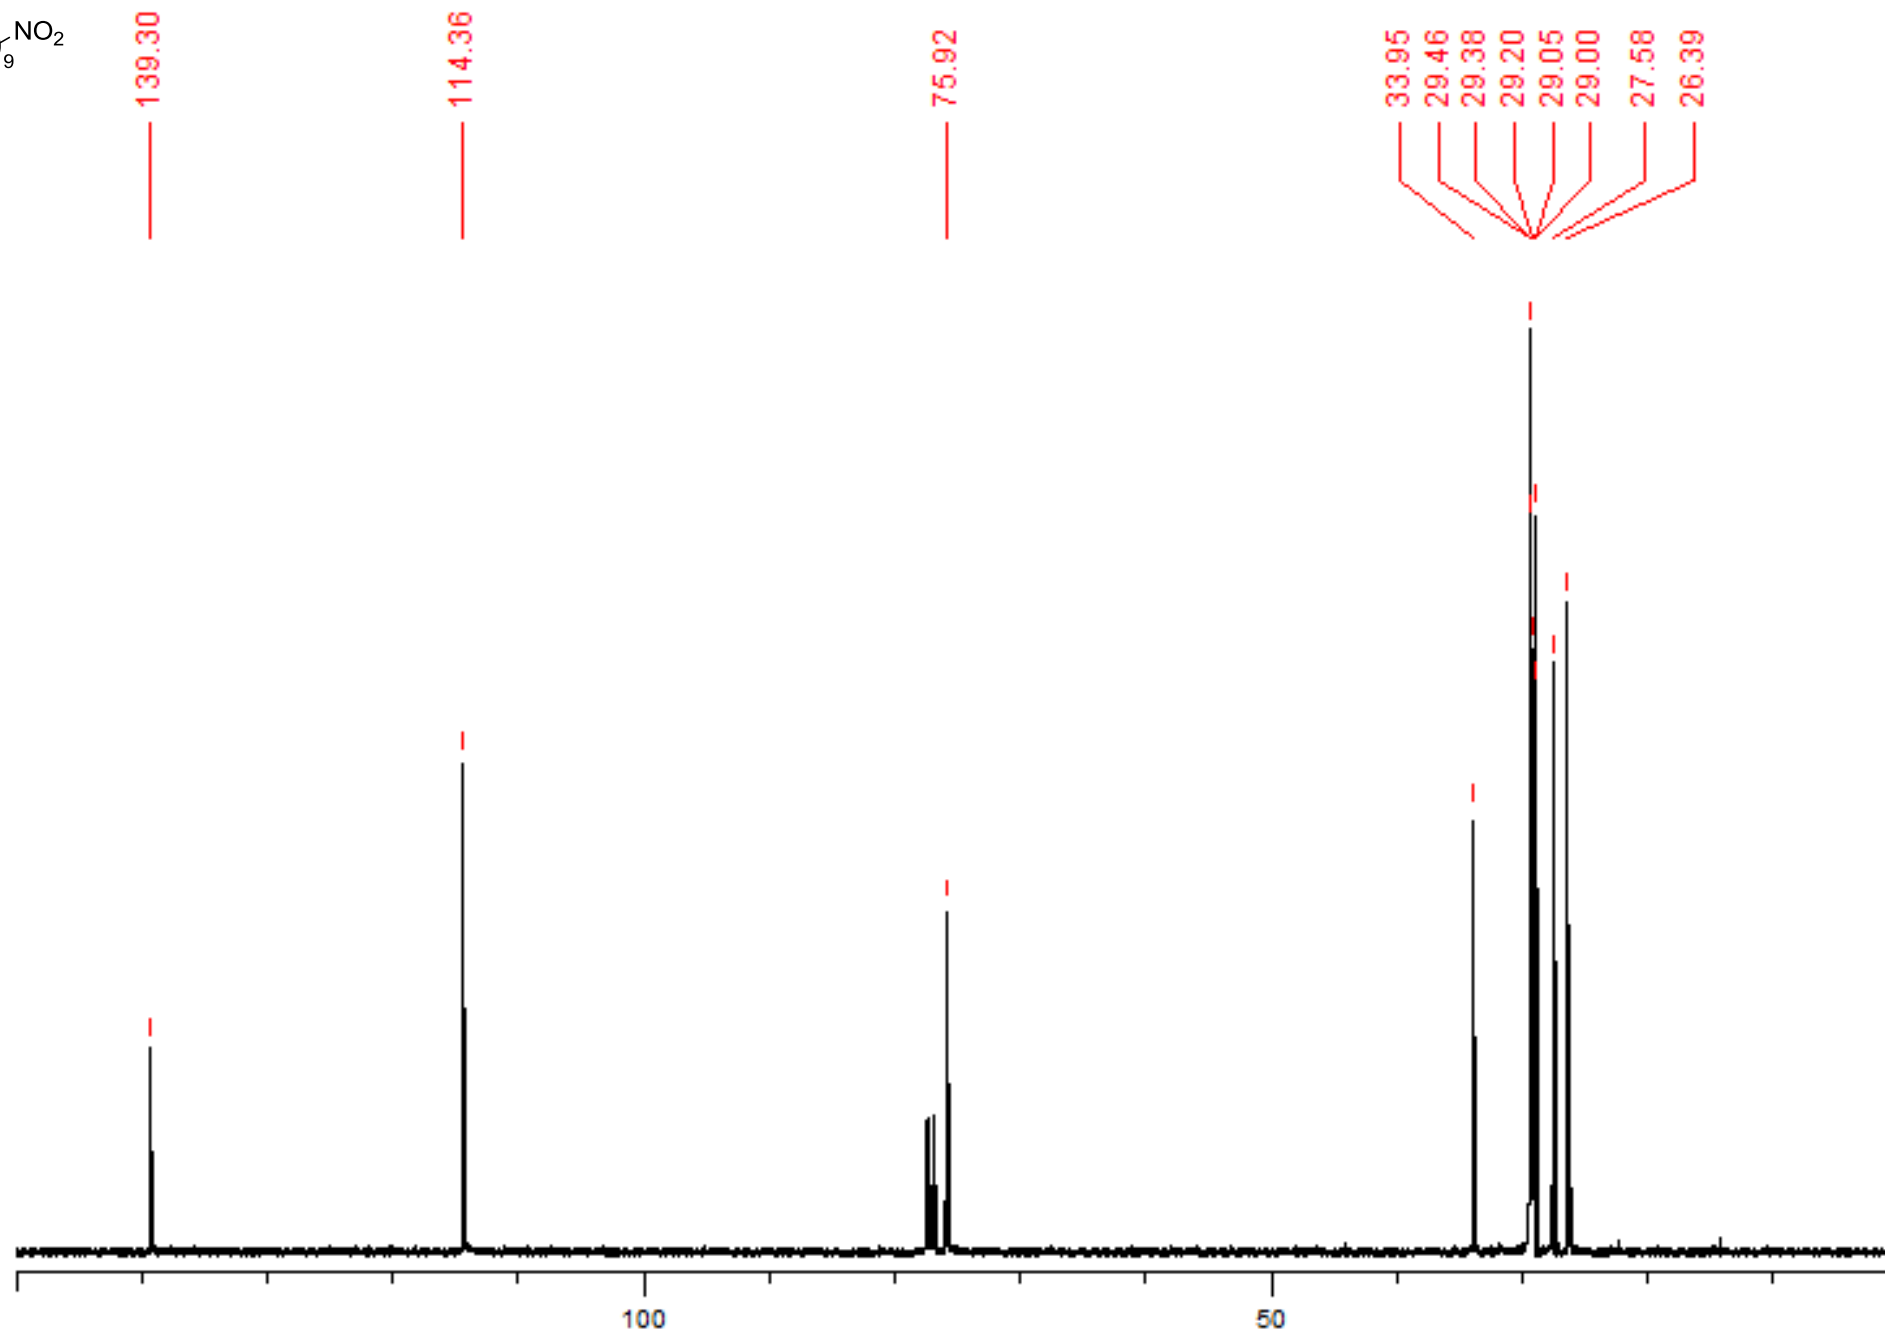

$^1\text{H}$  NMR - Compound **2g**.

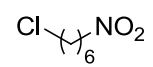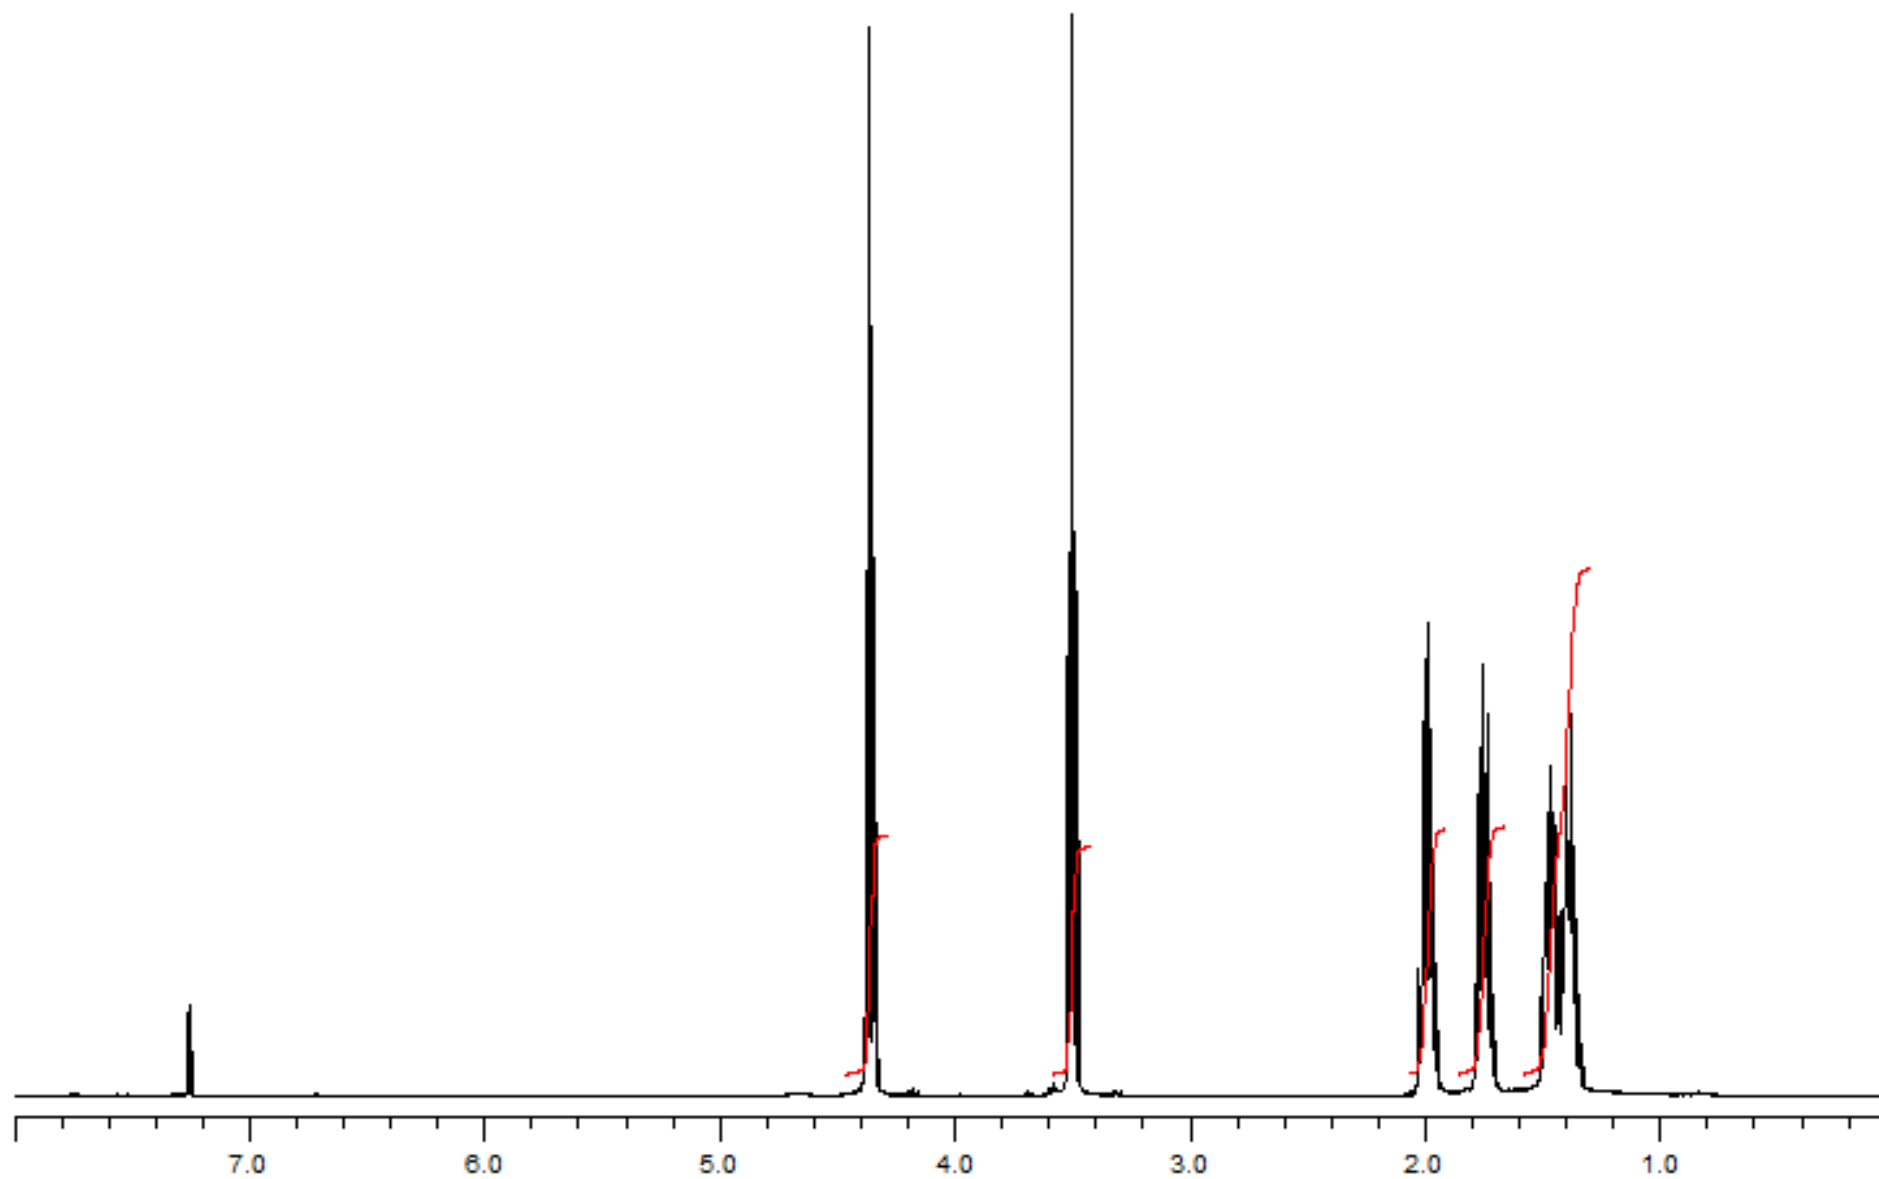

$^{13}\text{C}$  NMR - Compound **2g**.

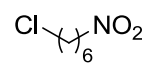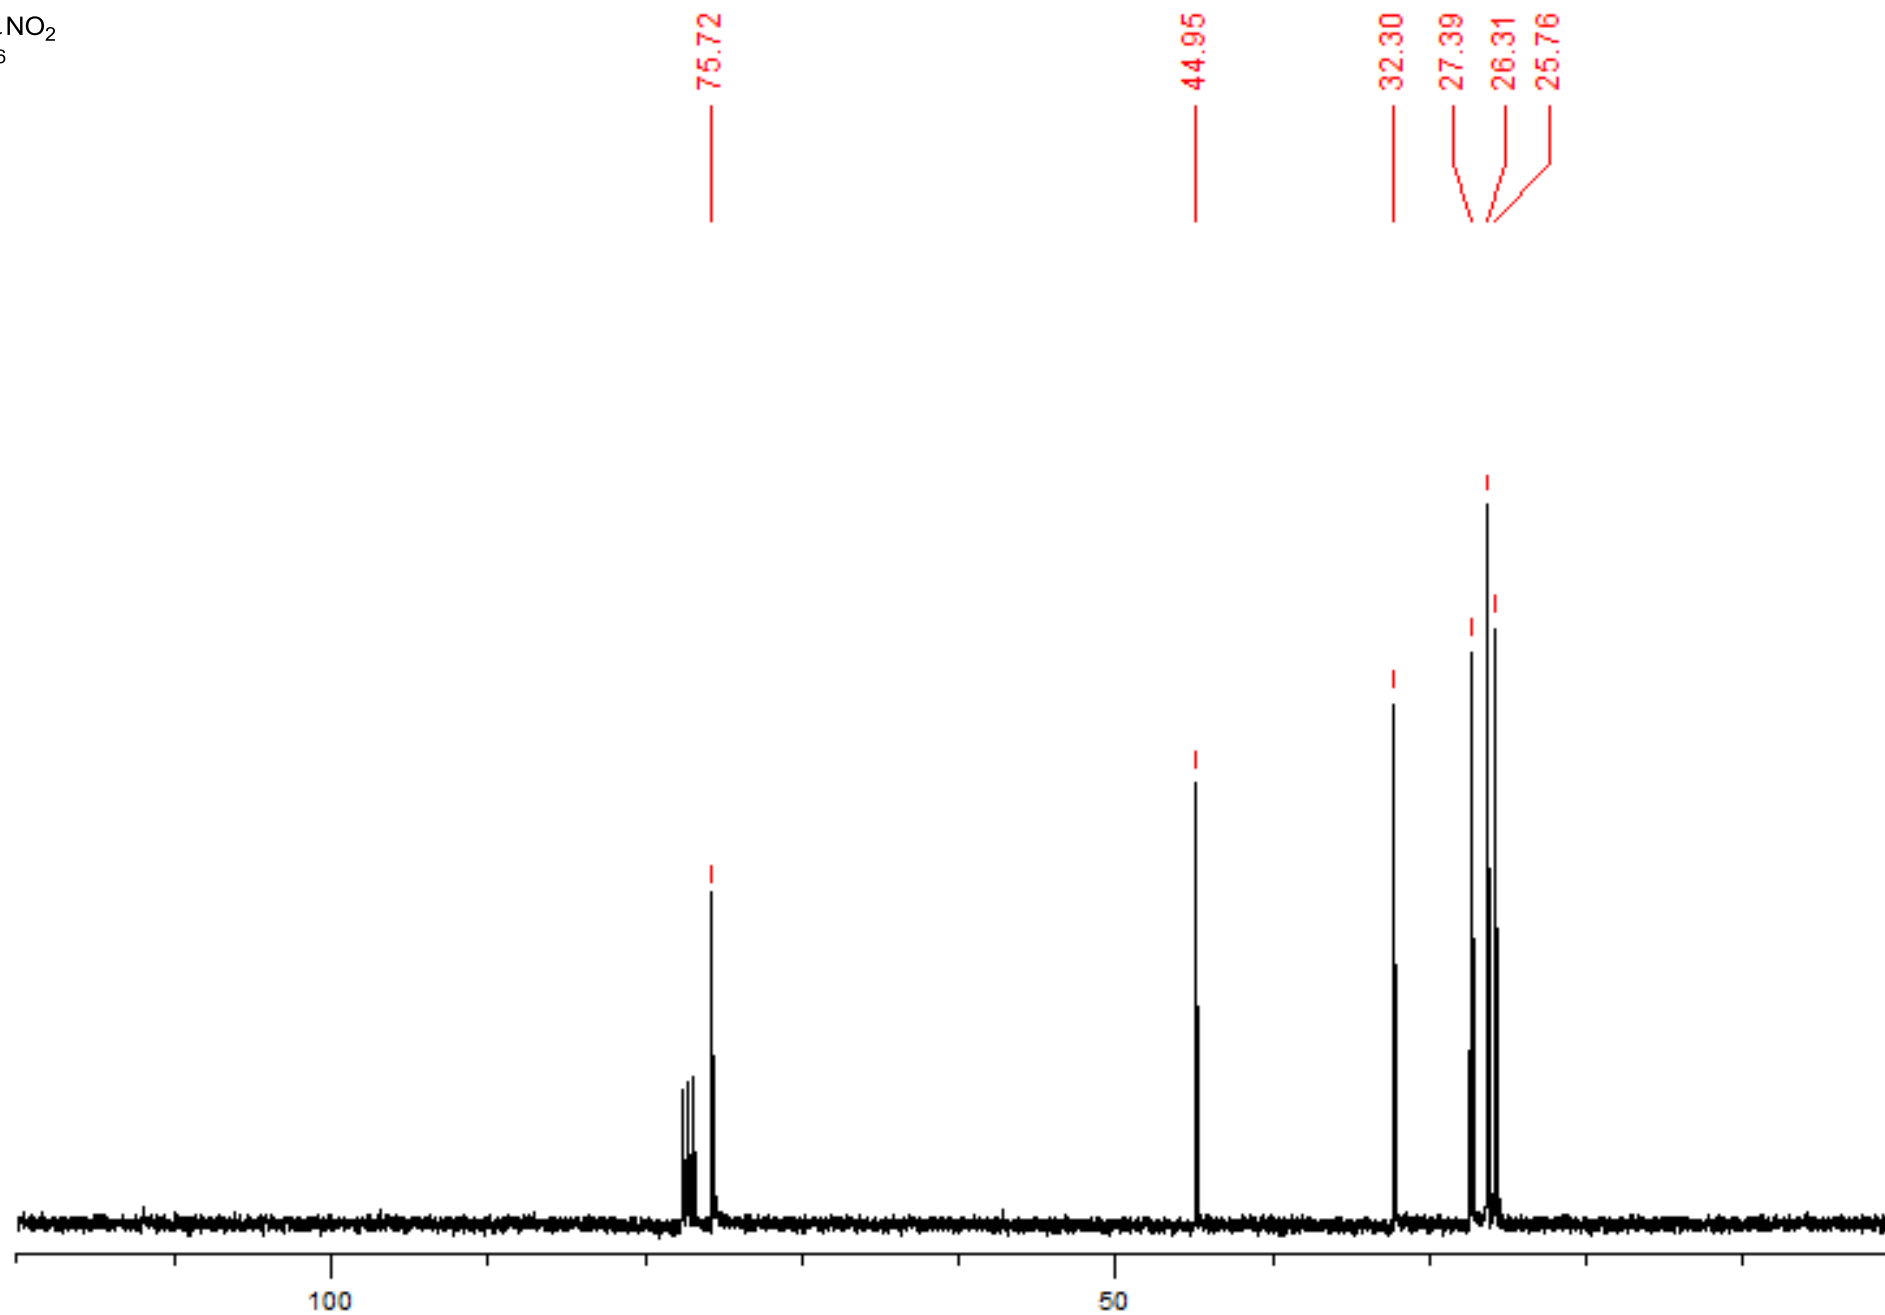

<sup>1</sup>H NMR - Compound **2h**.

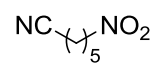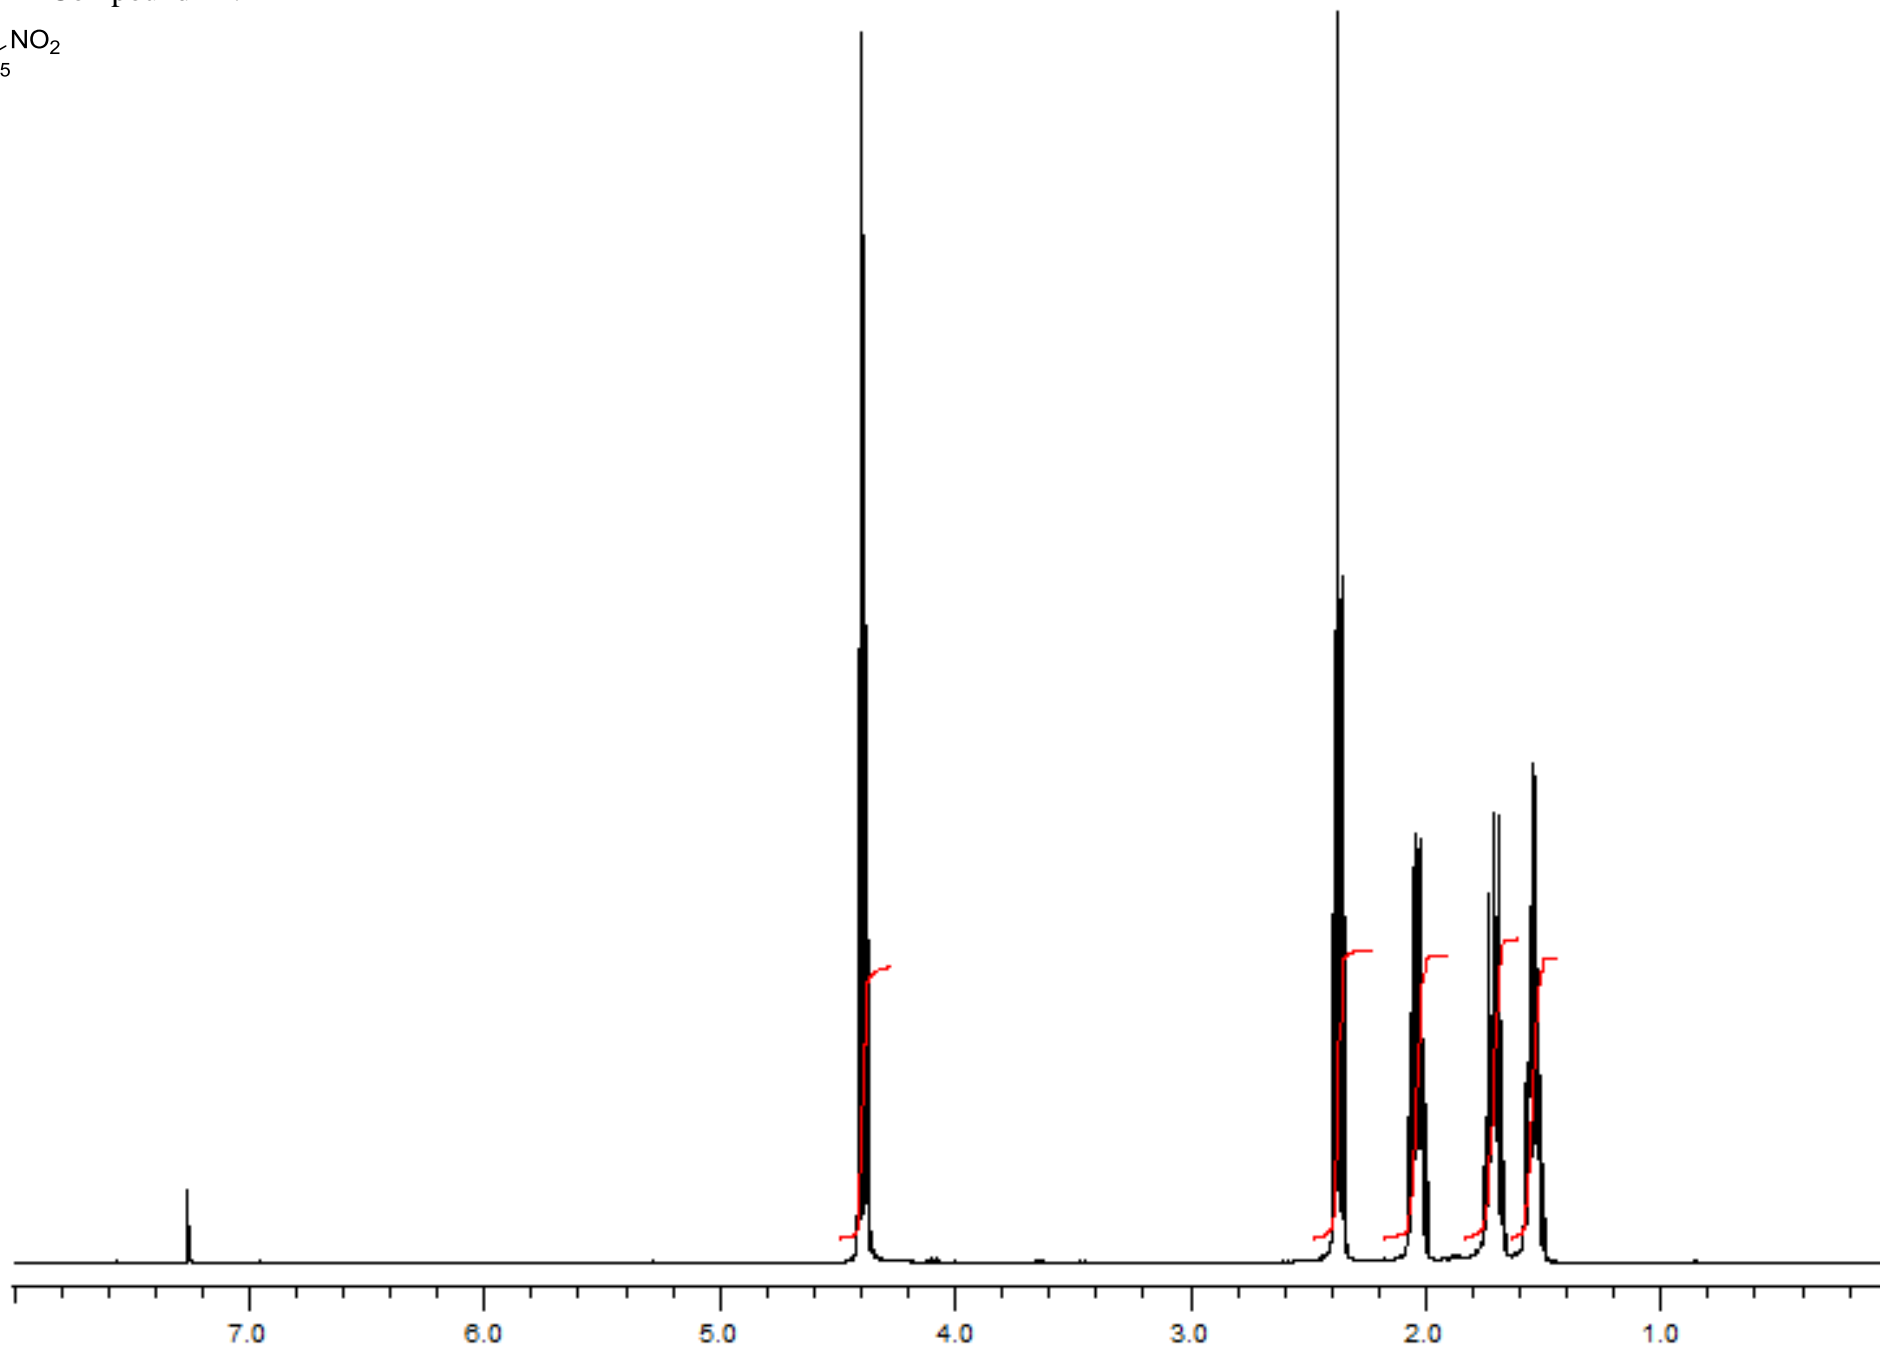



<sup>13</sup>C NMR - Compound **2h**.

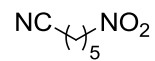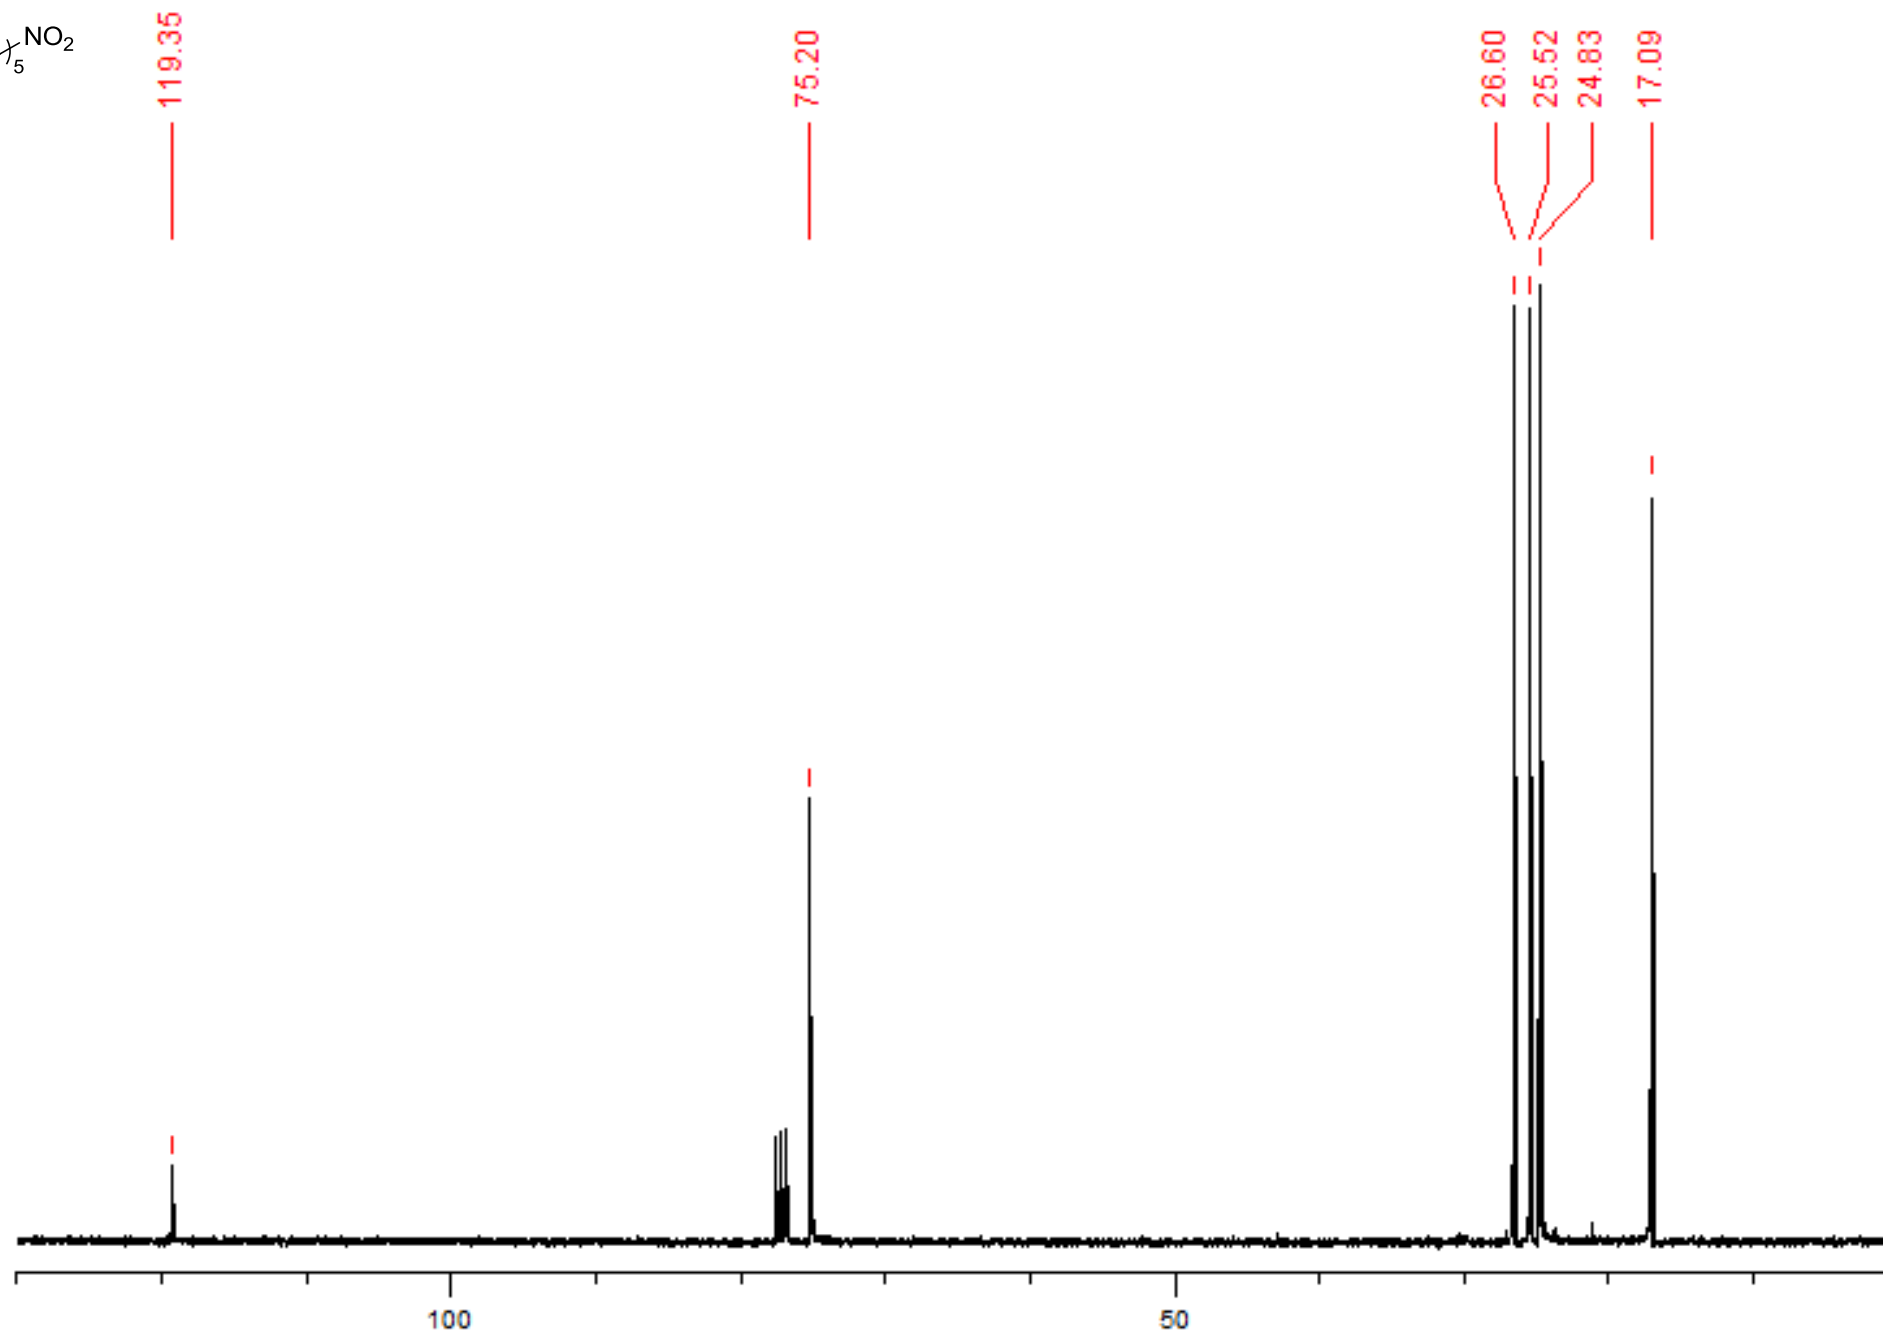

$^1\text{H}$  NMR - Compound **2i**.

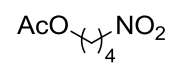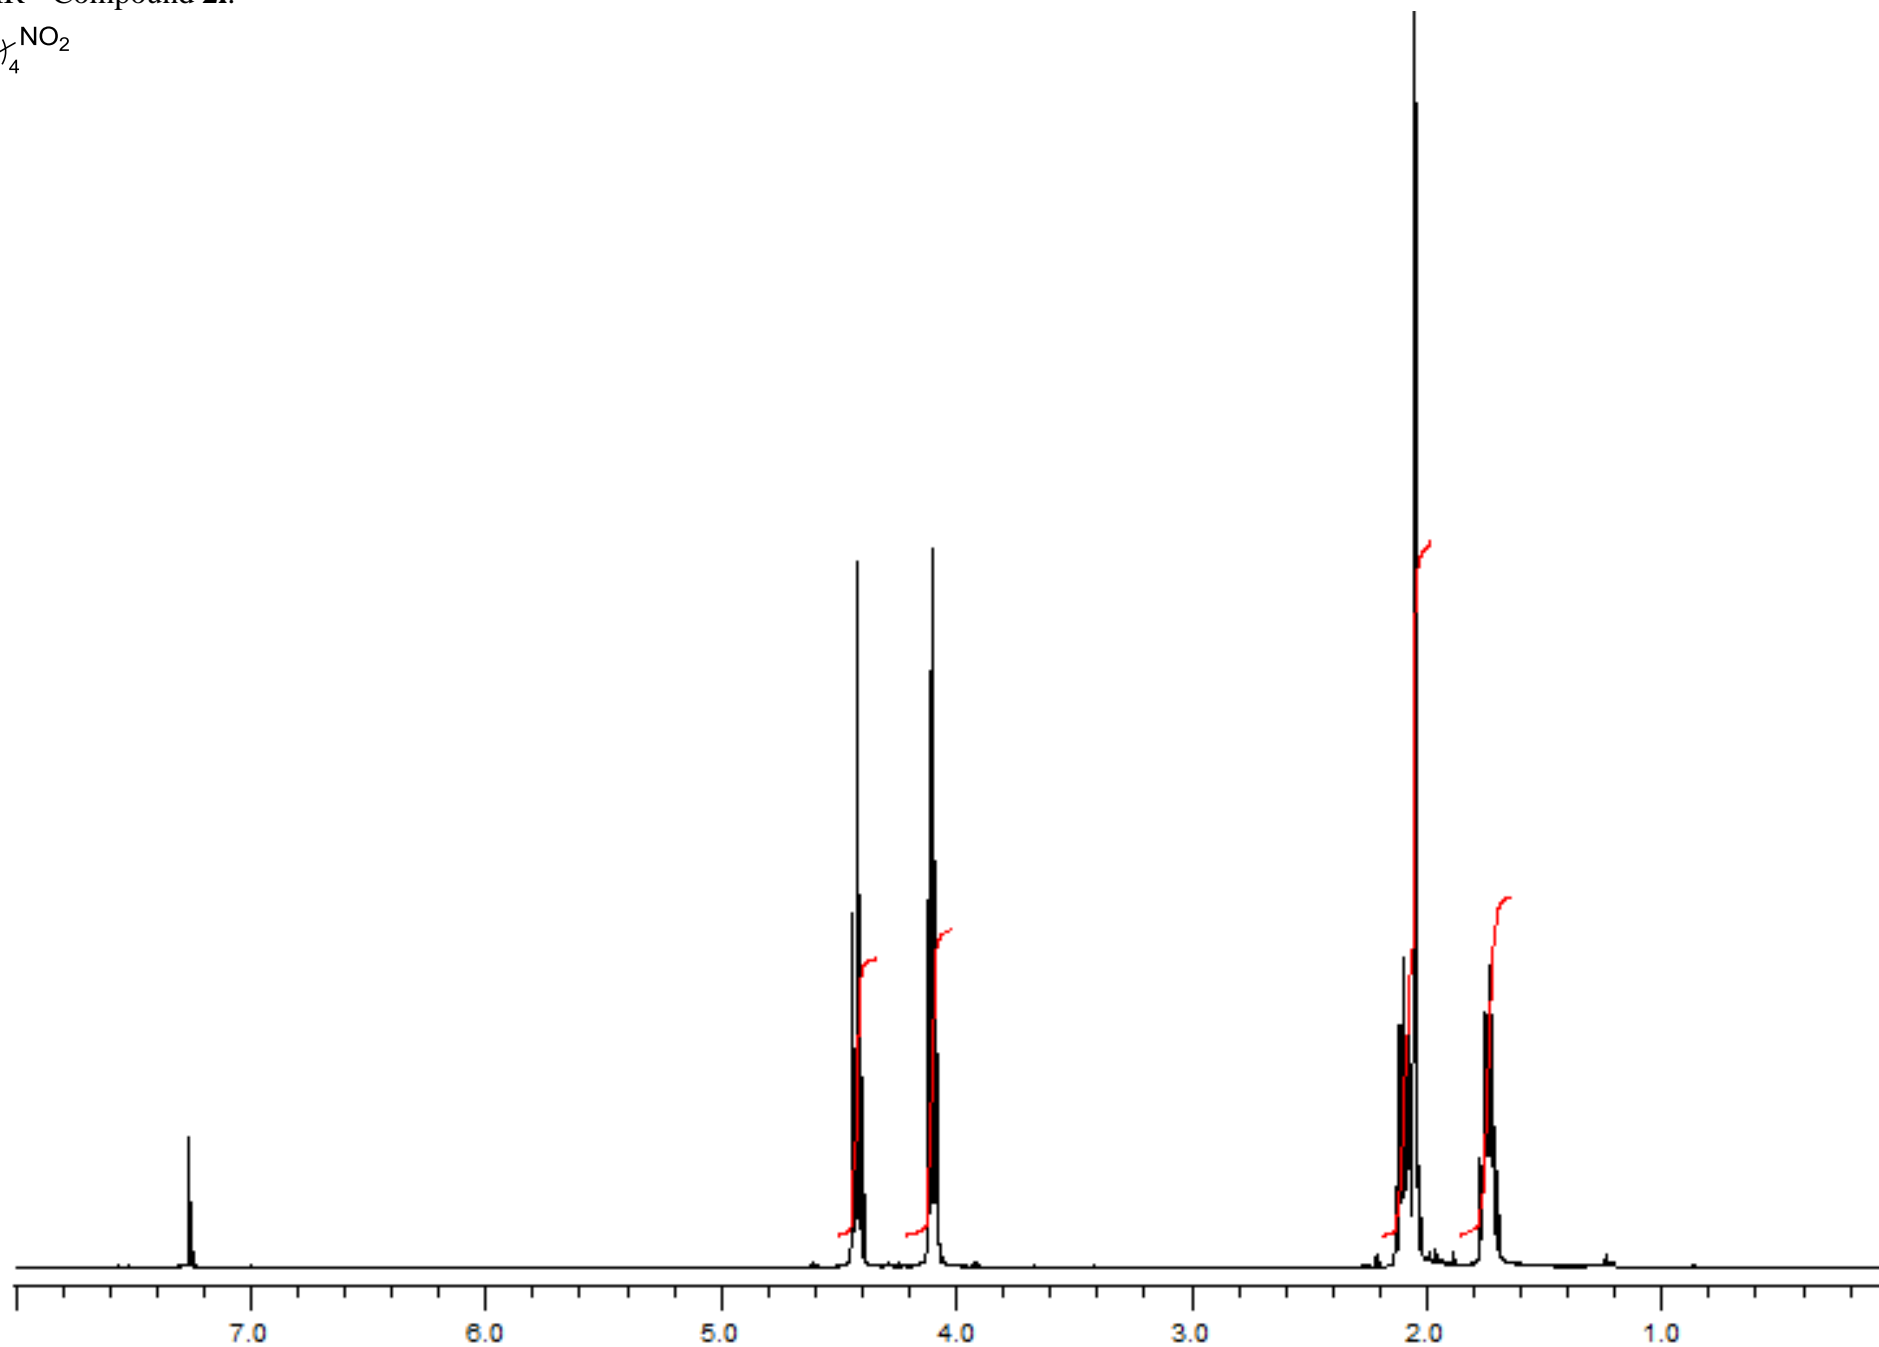

$^{13}\text{C}$  NMR - Compound **2i**.

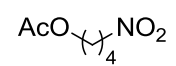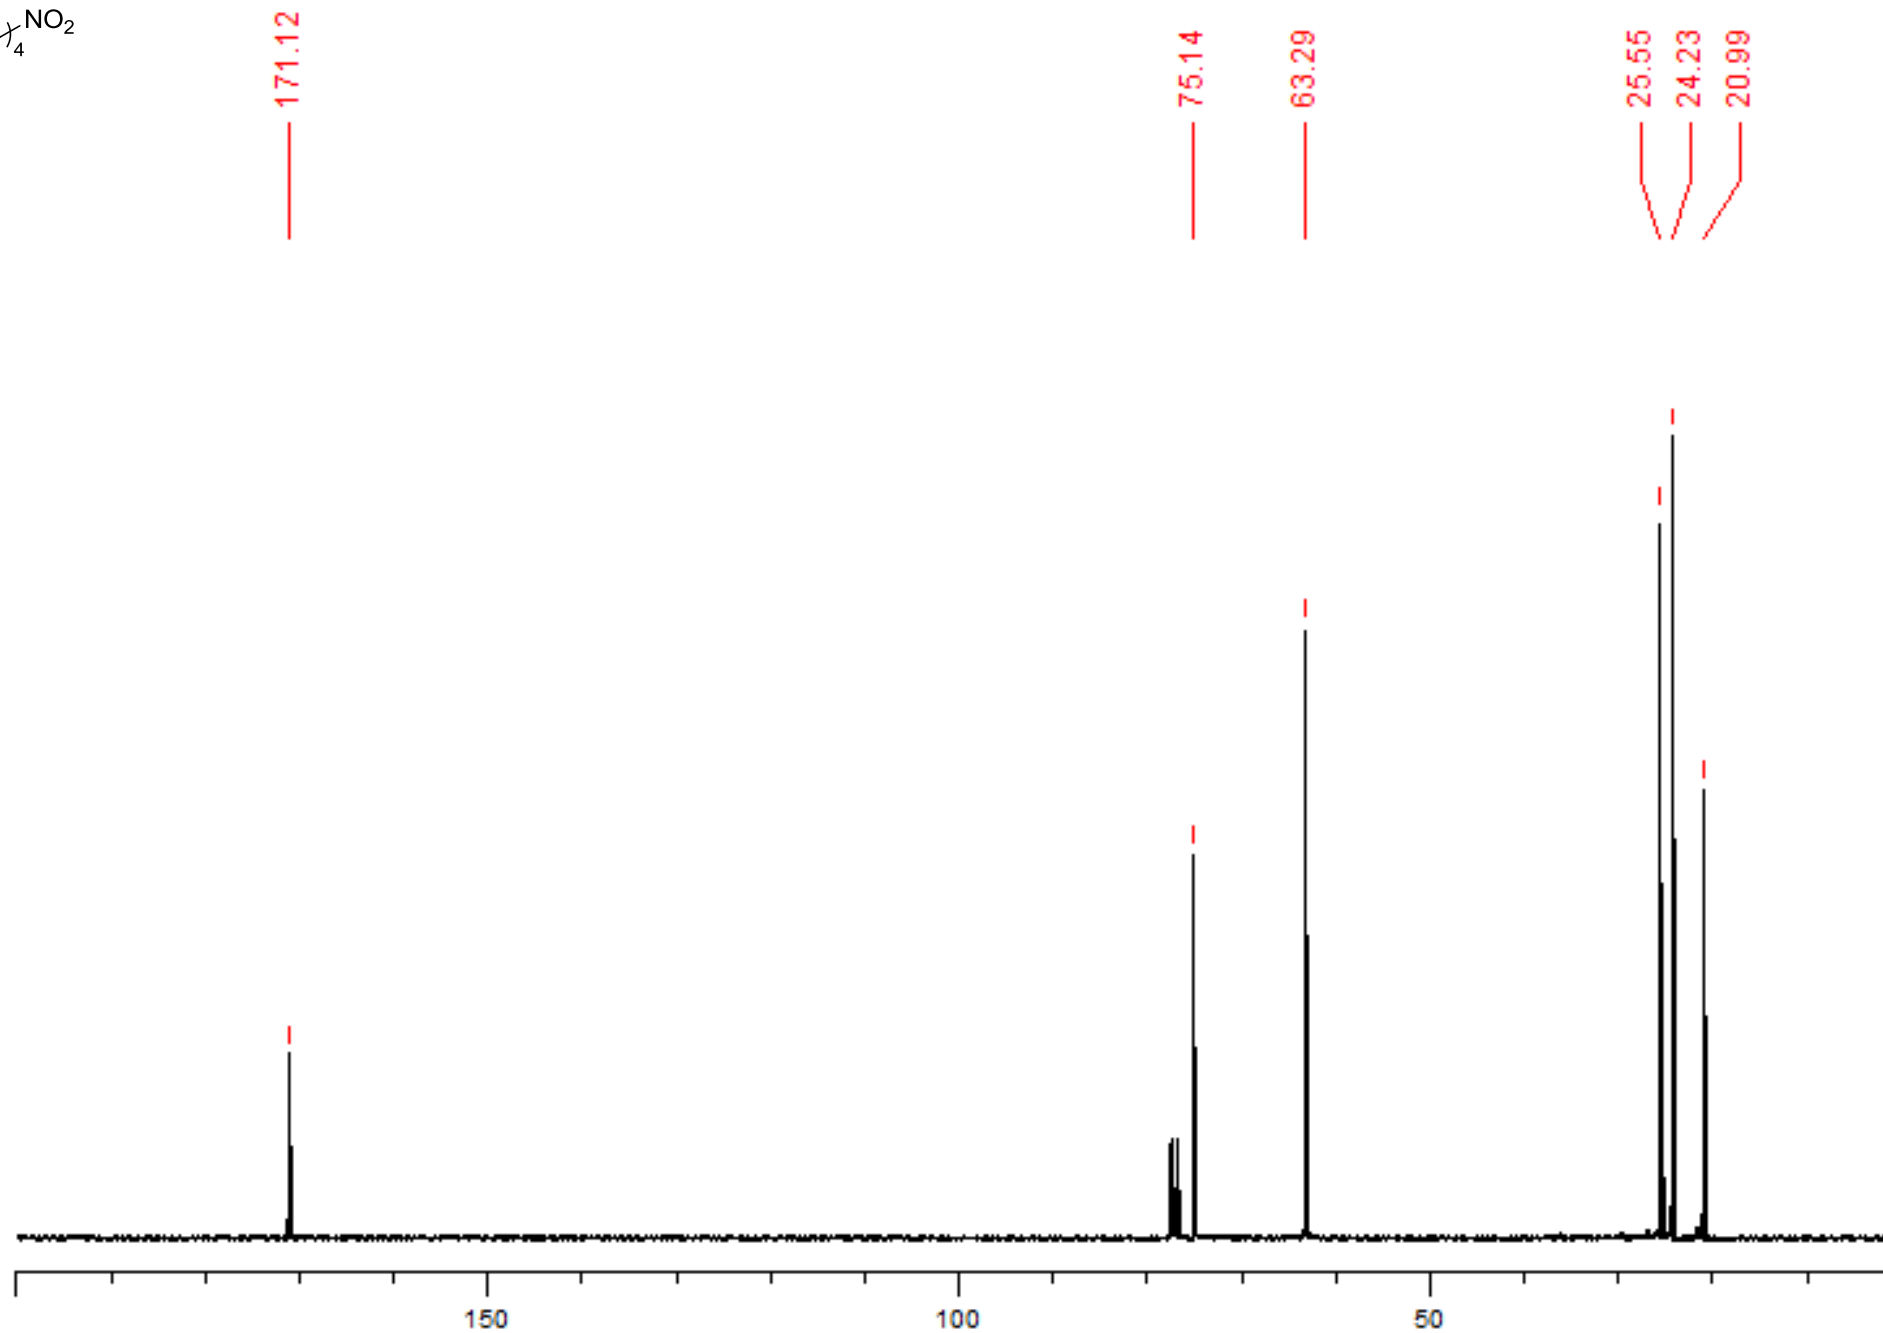

CCCCC/C=C/CC[N+](=O)[O-]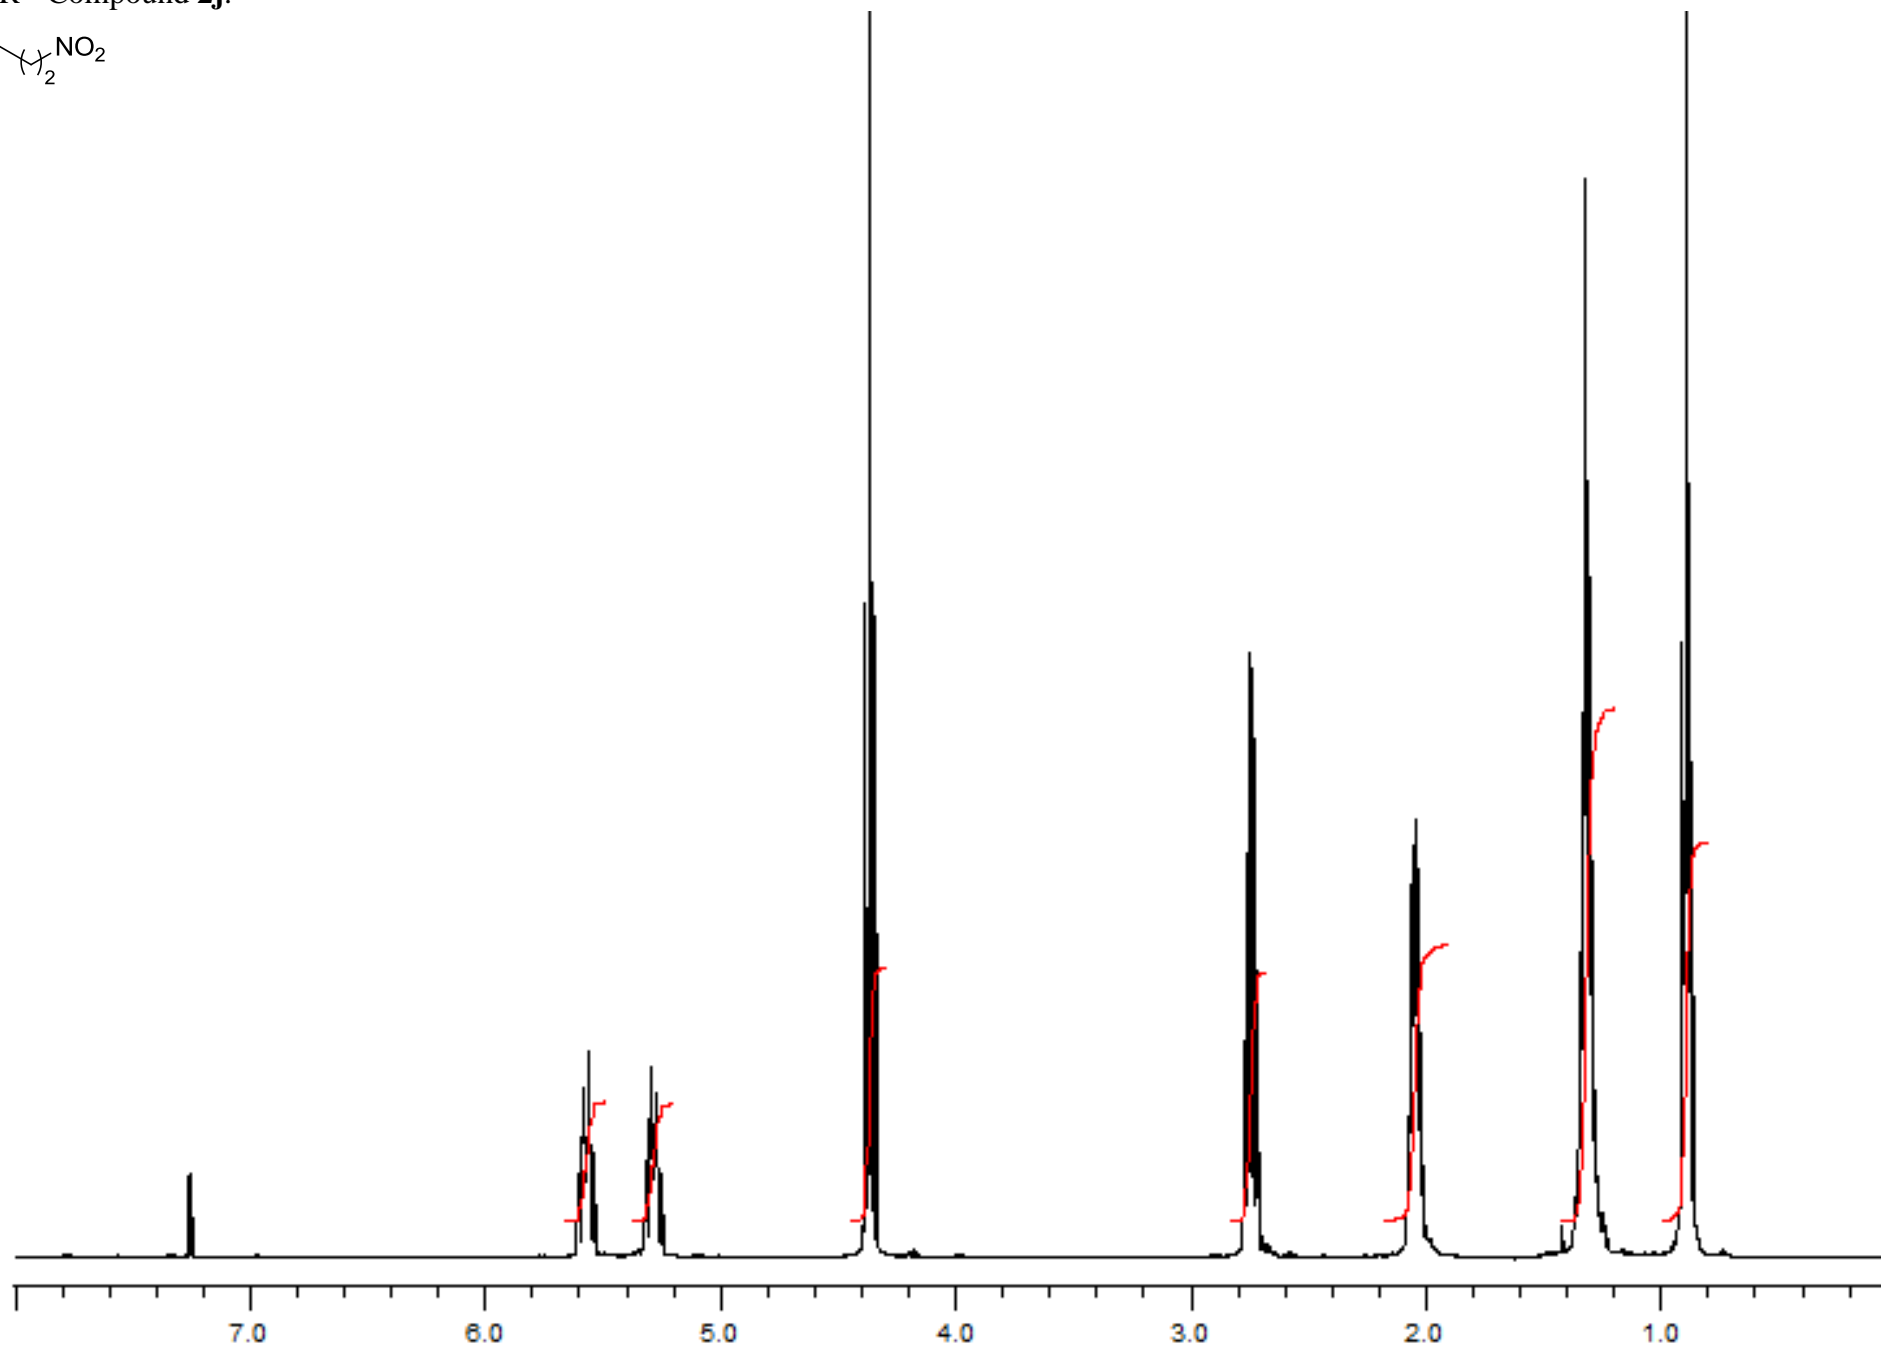

$^{13}\text{C}$  NMR - Compound **2j**.

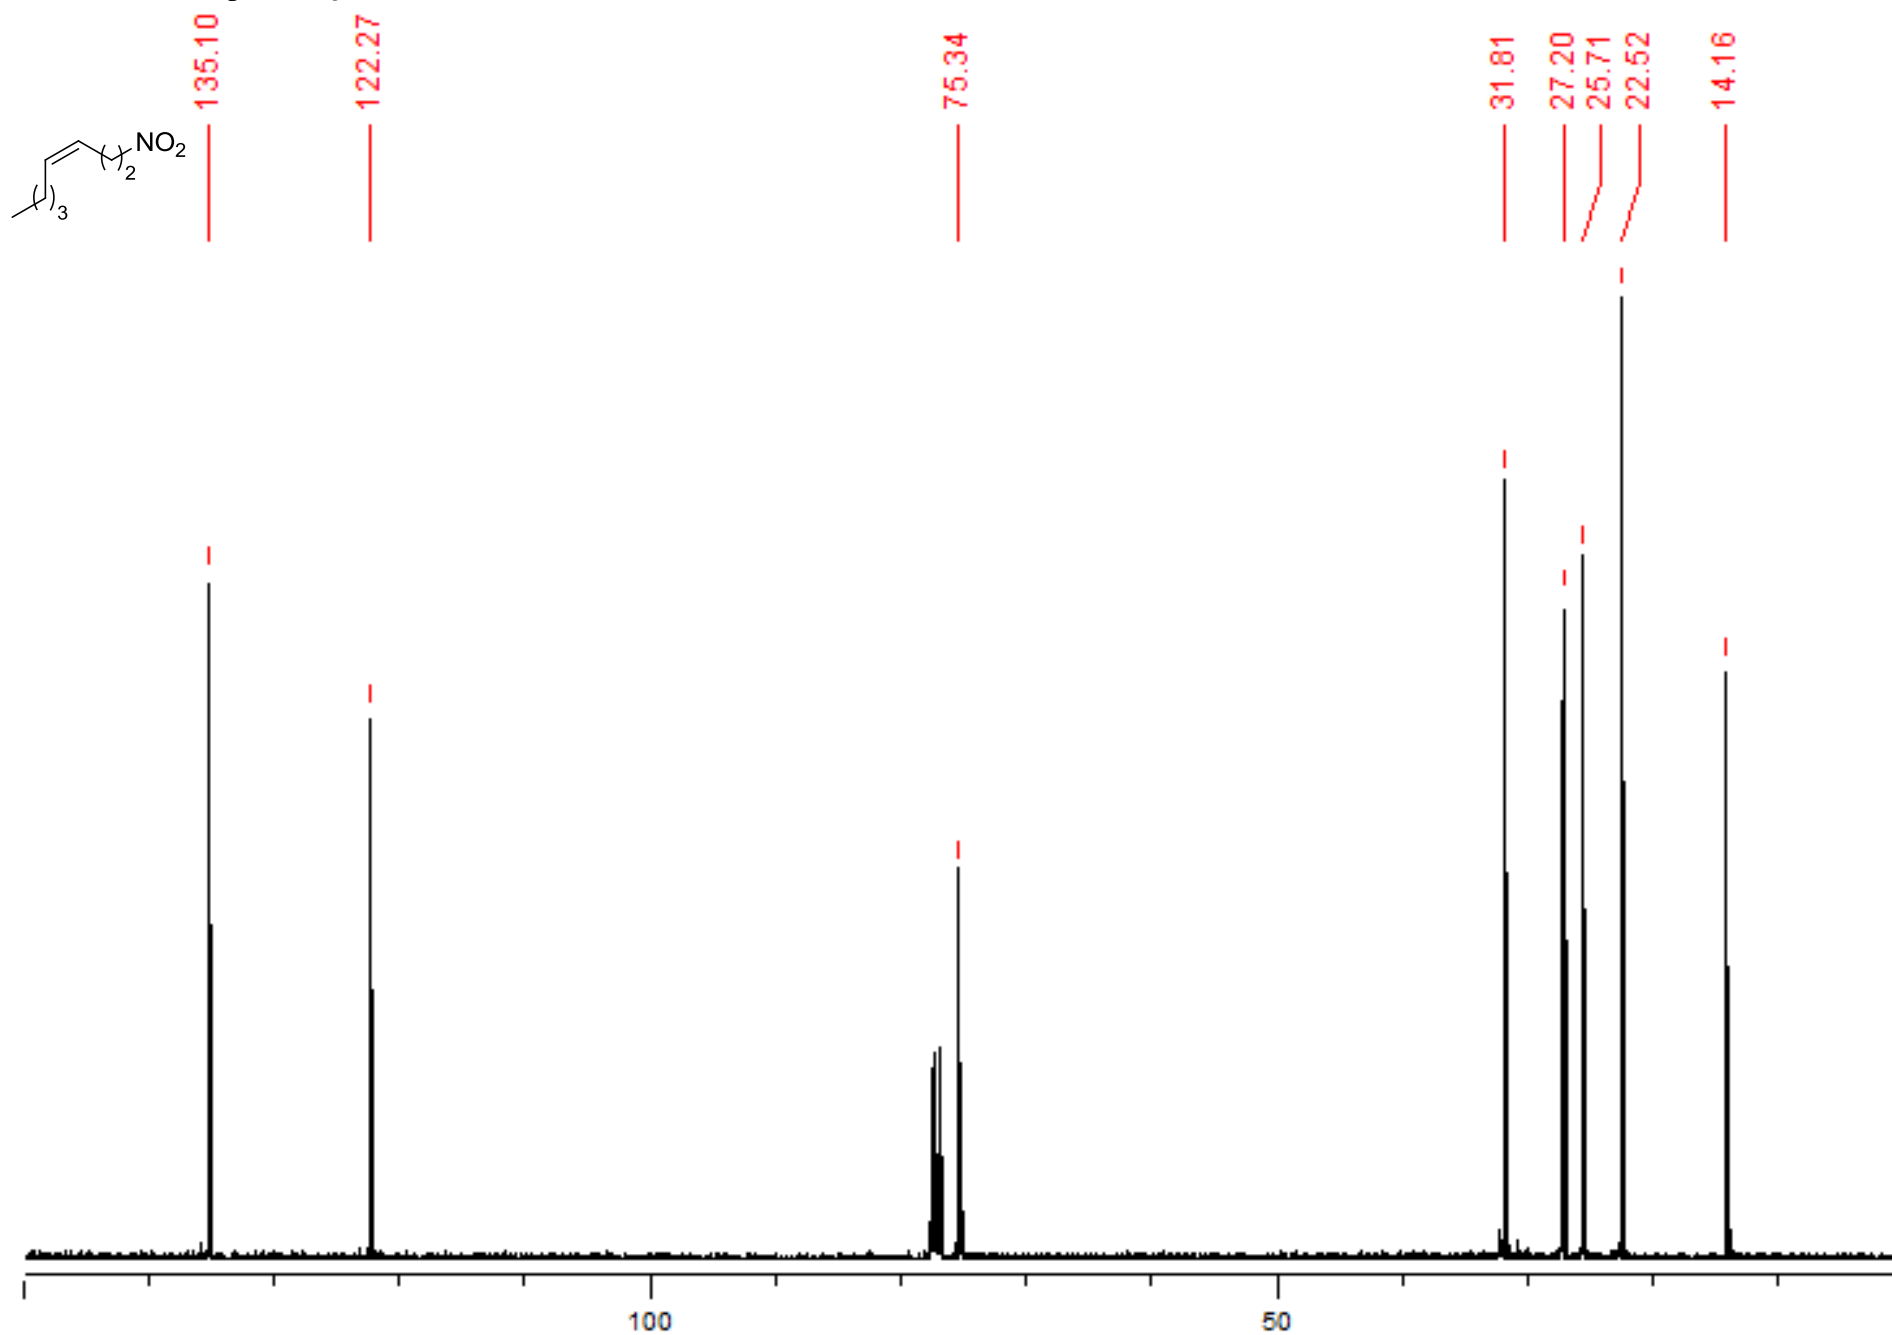

$^1\text{H}$  NMR - Compound **2k**.

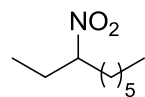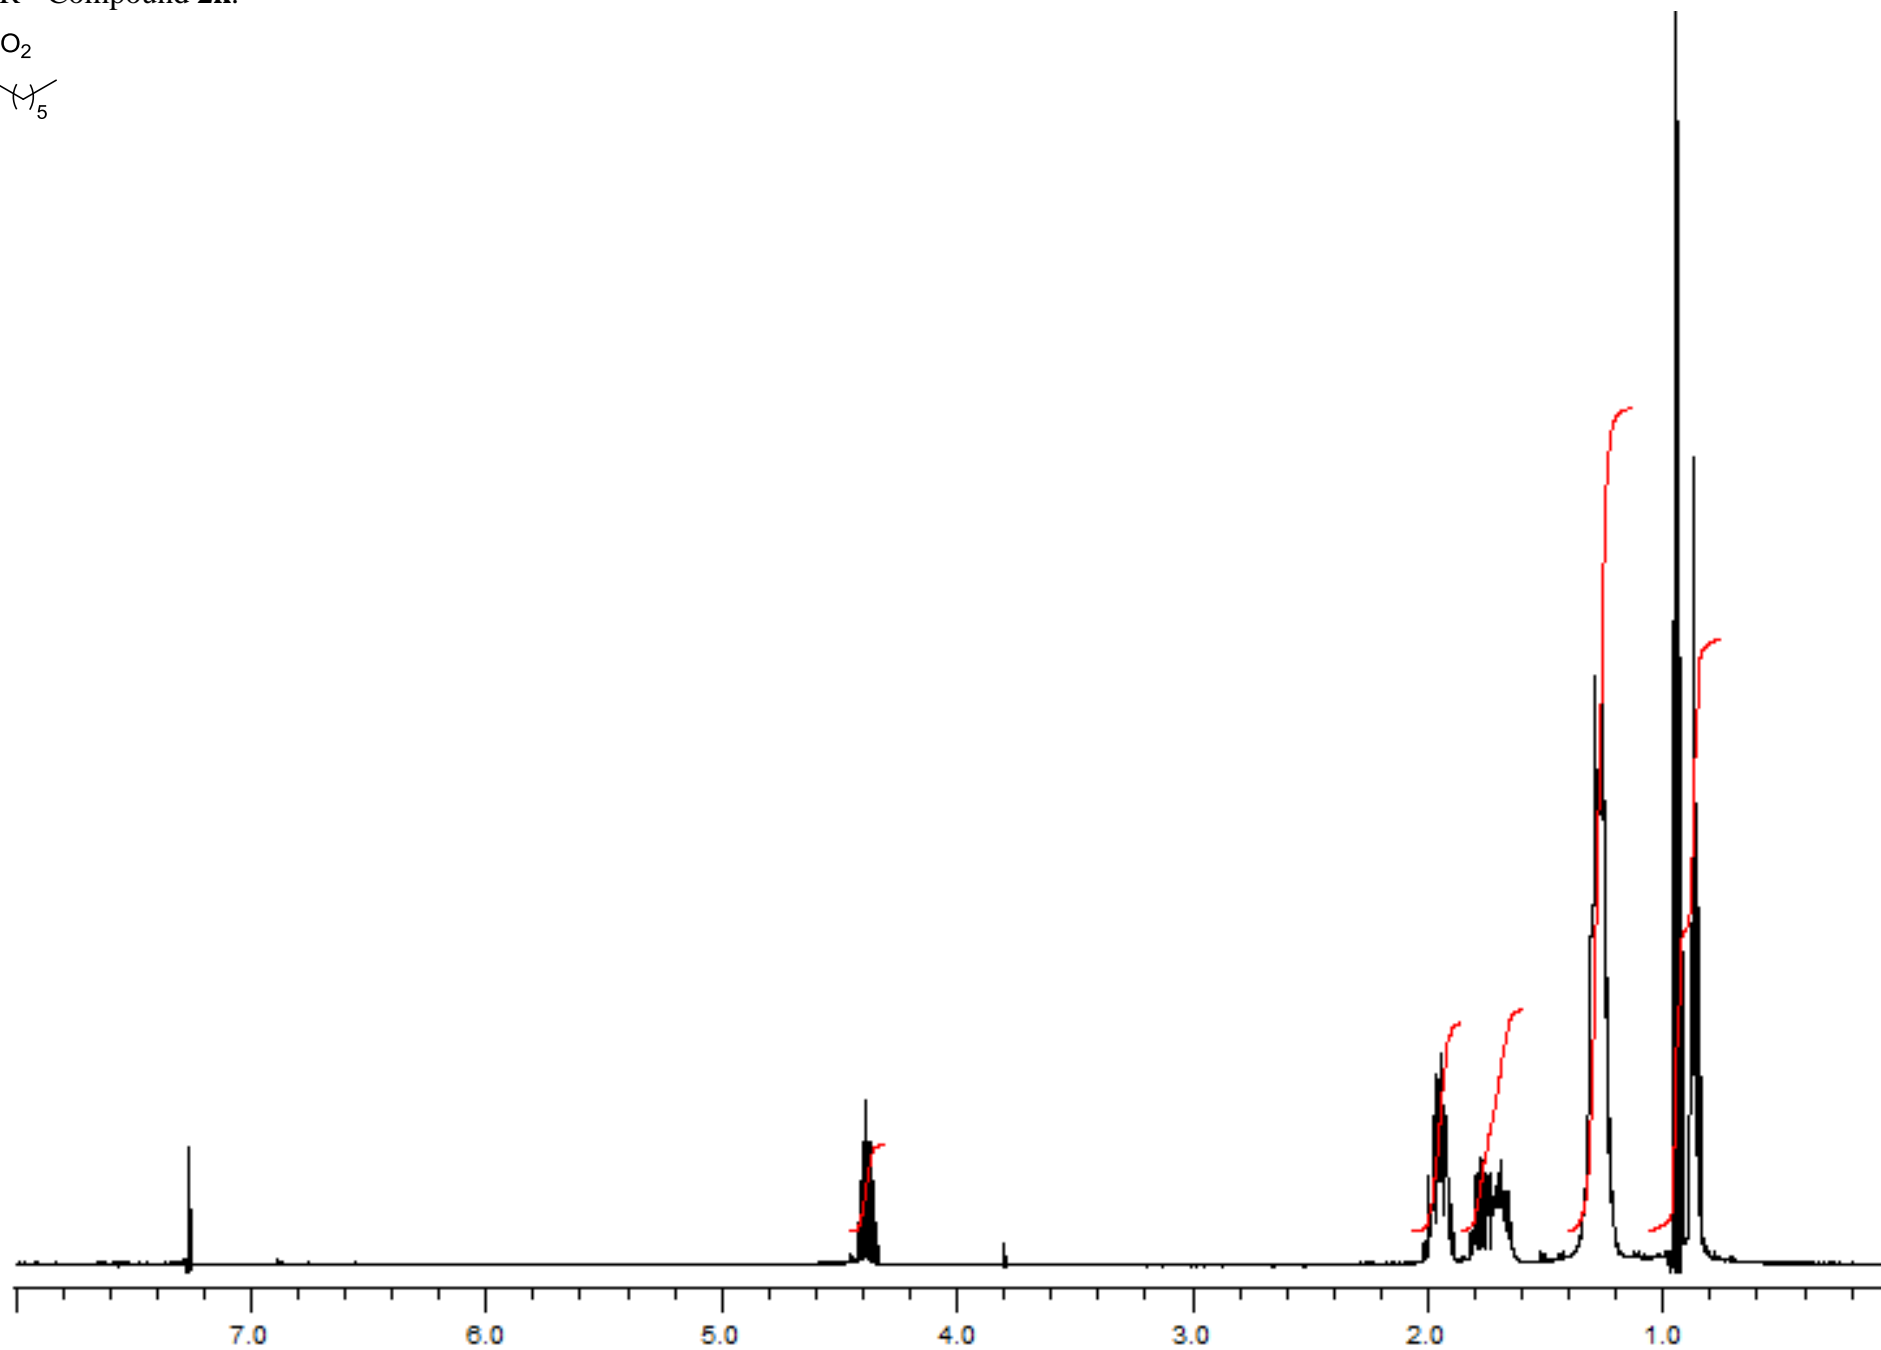

$^{13}\text{C}$  NMR - Compound **2k**.

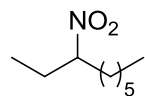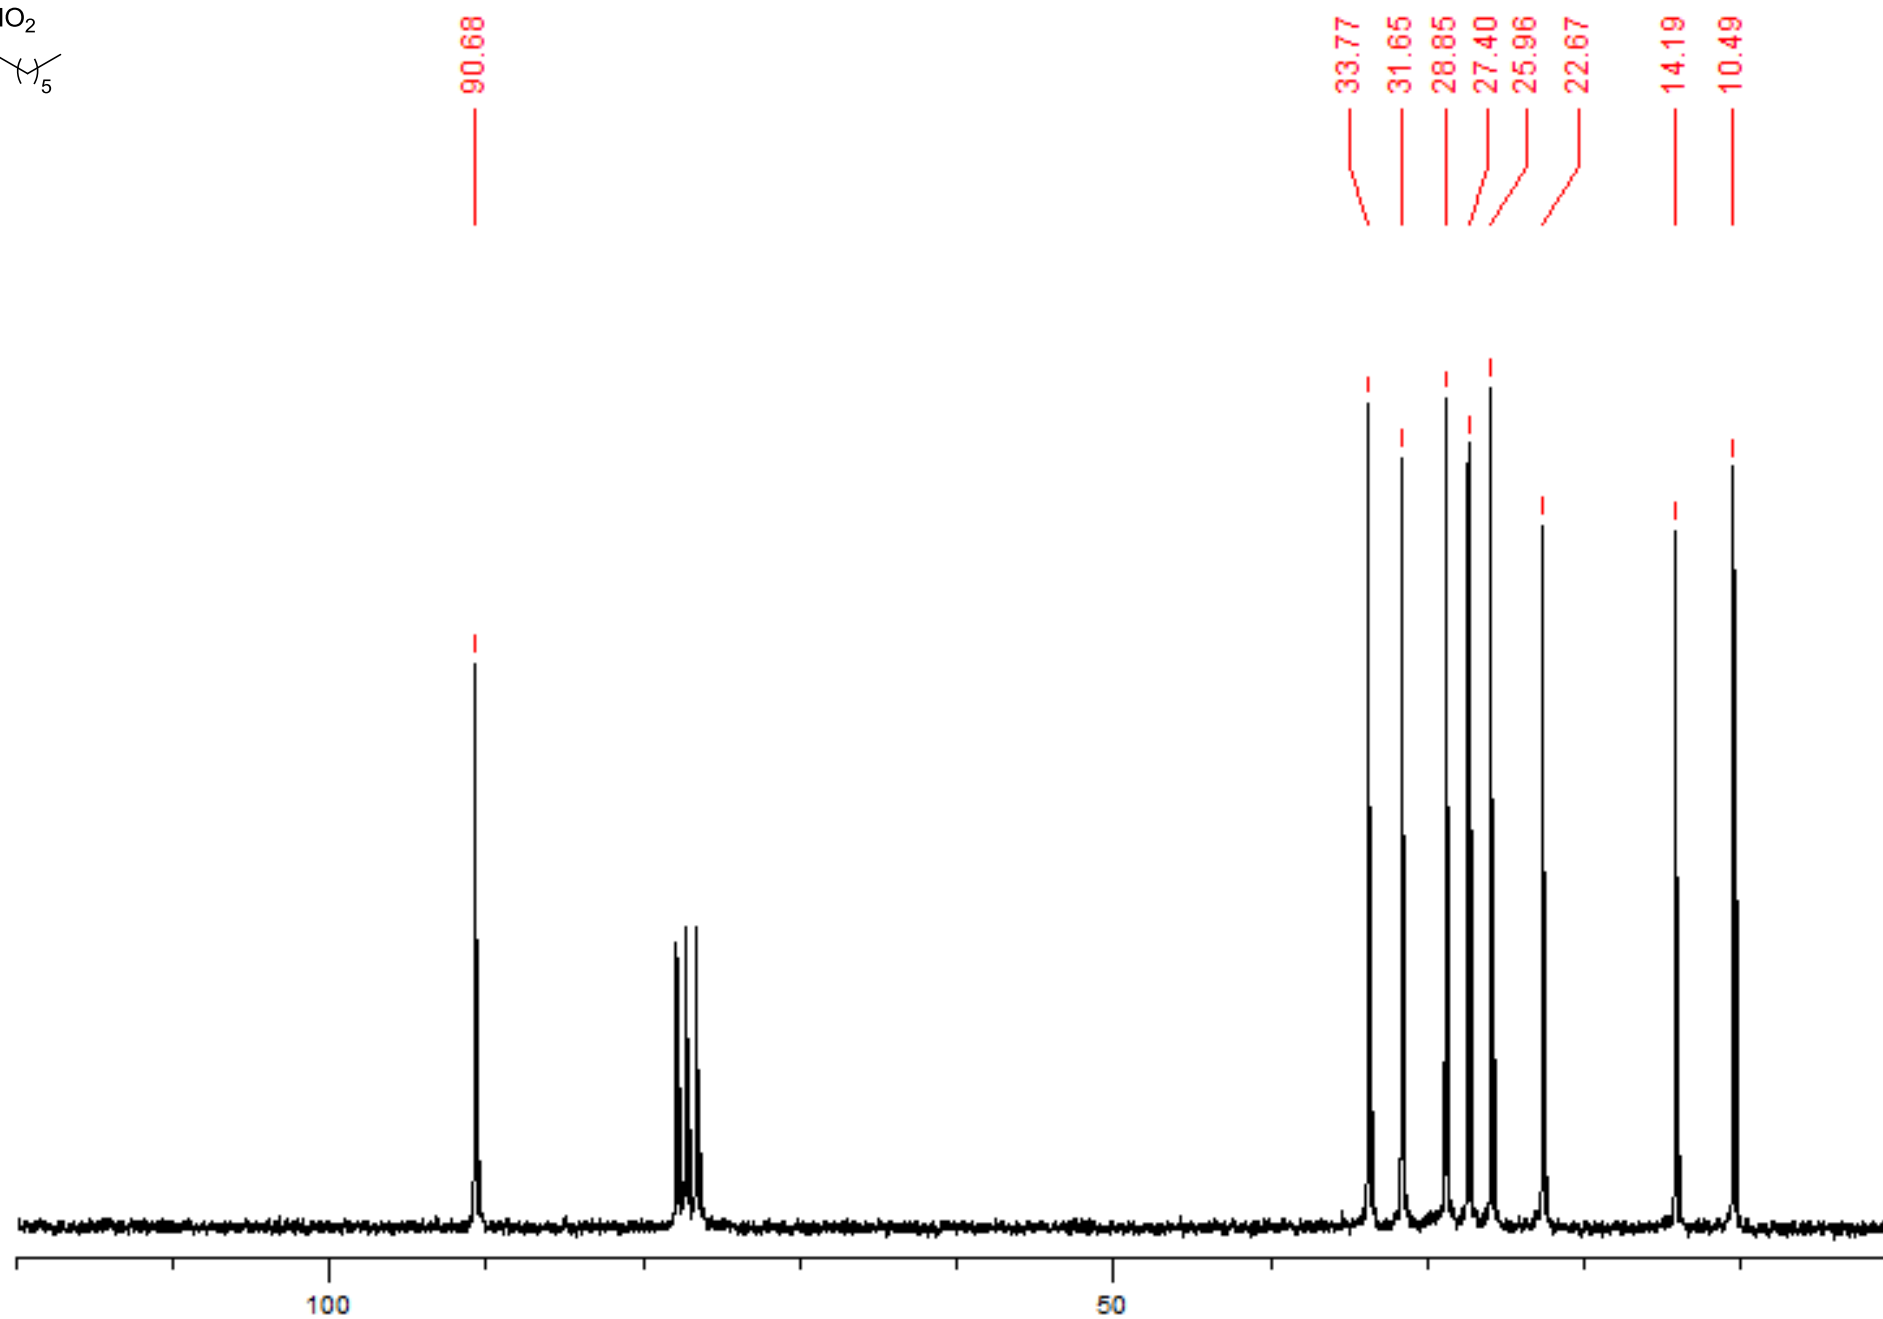

$^1\text{H}$  NMR - Compound **21**.

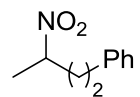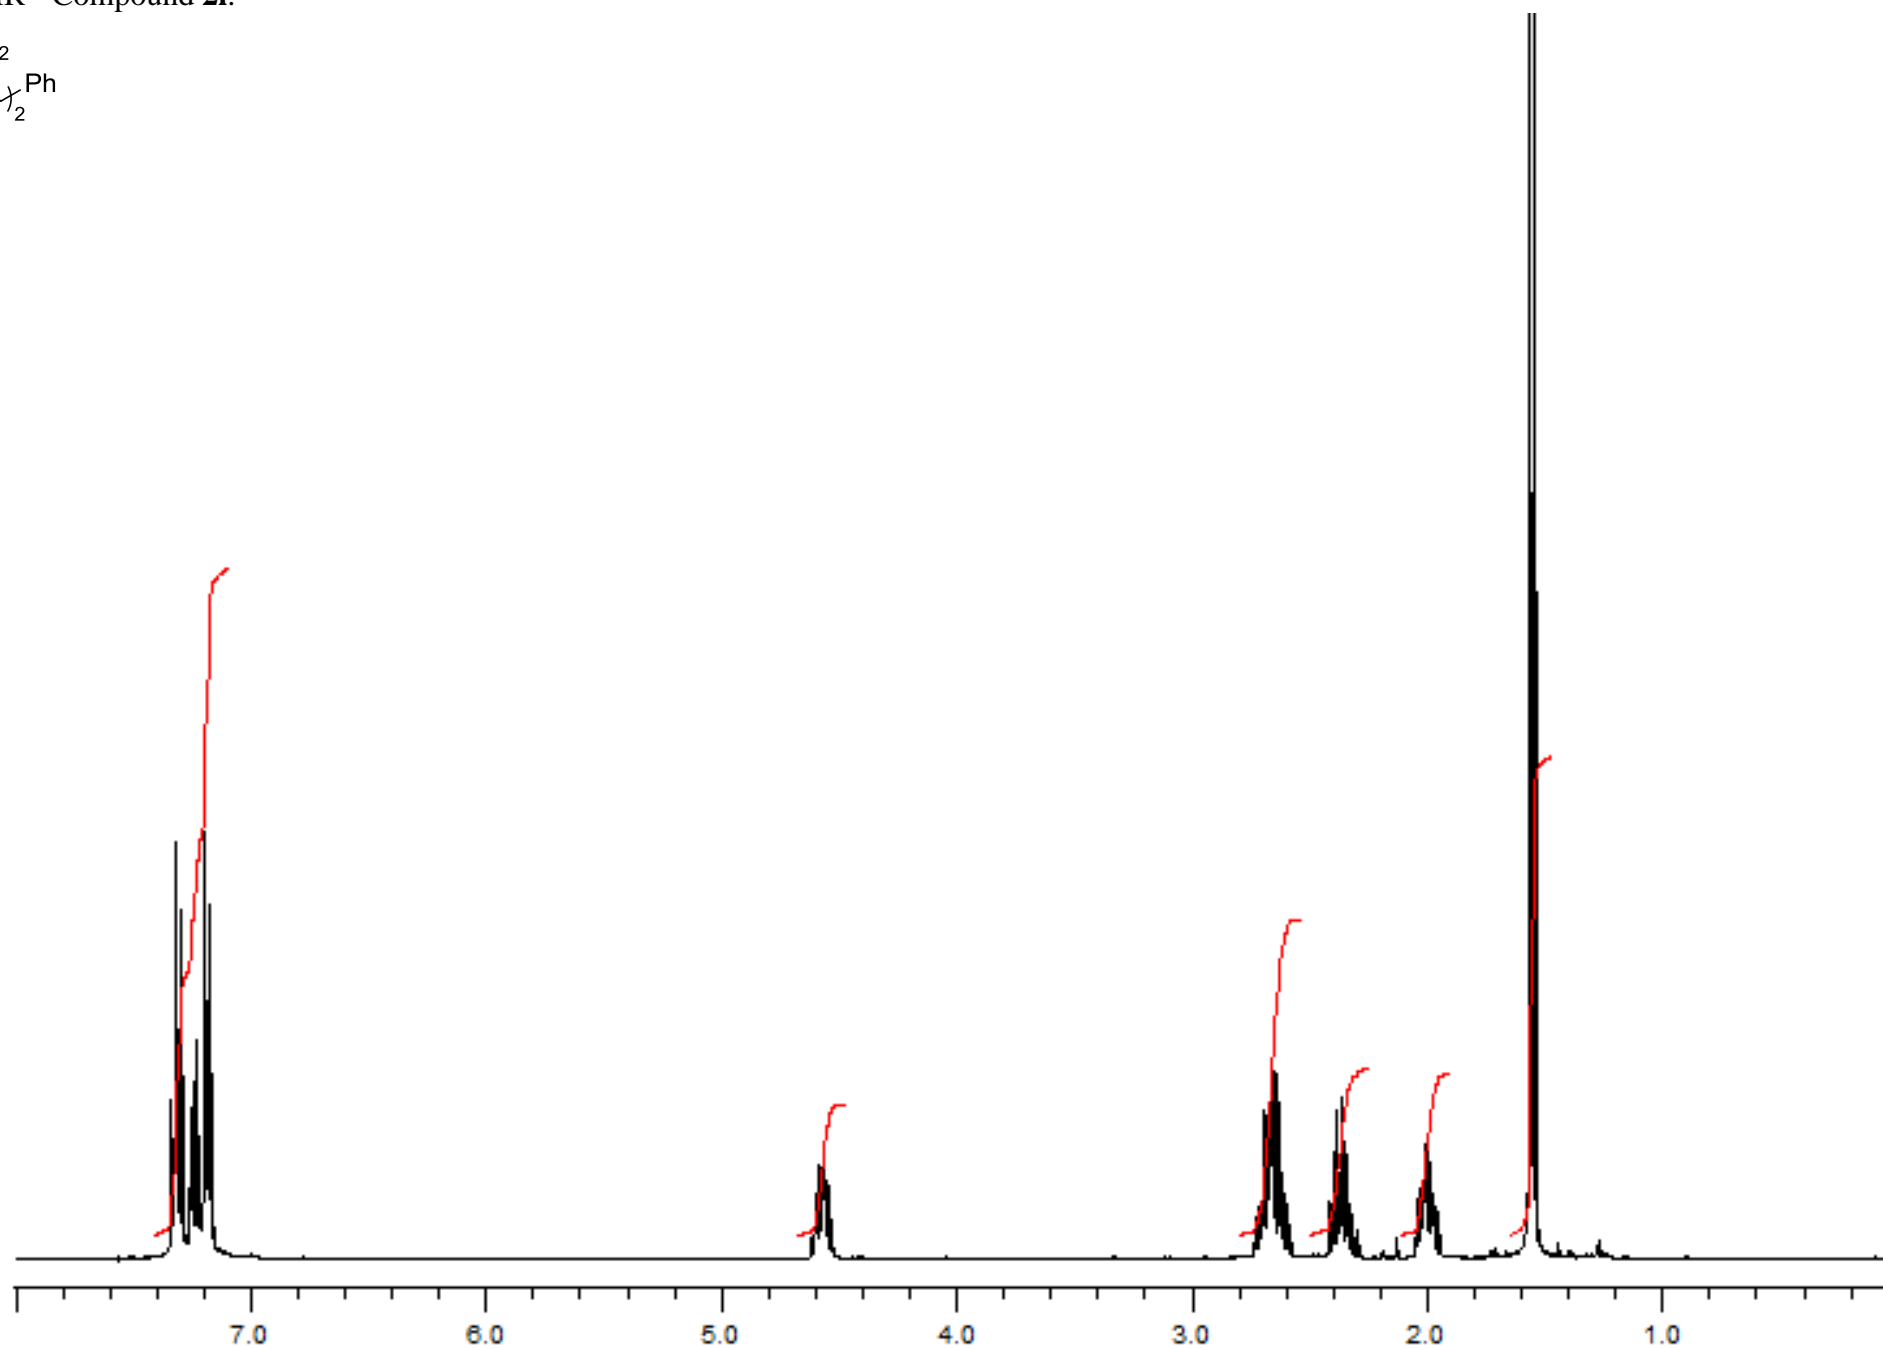



$^{13}\text{C}$  NMR - Compound **2l**.

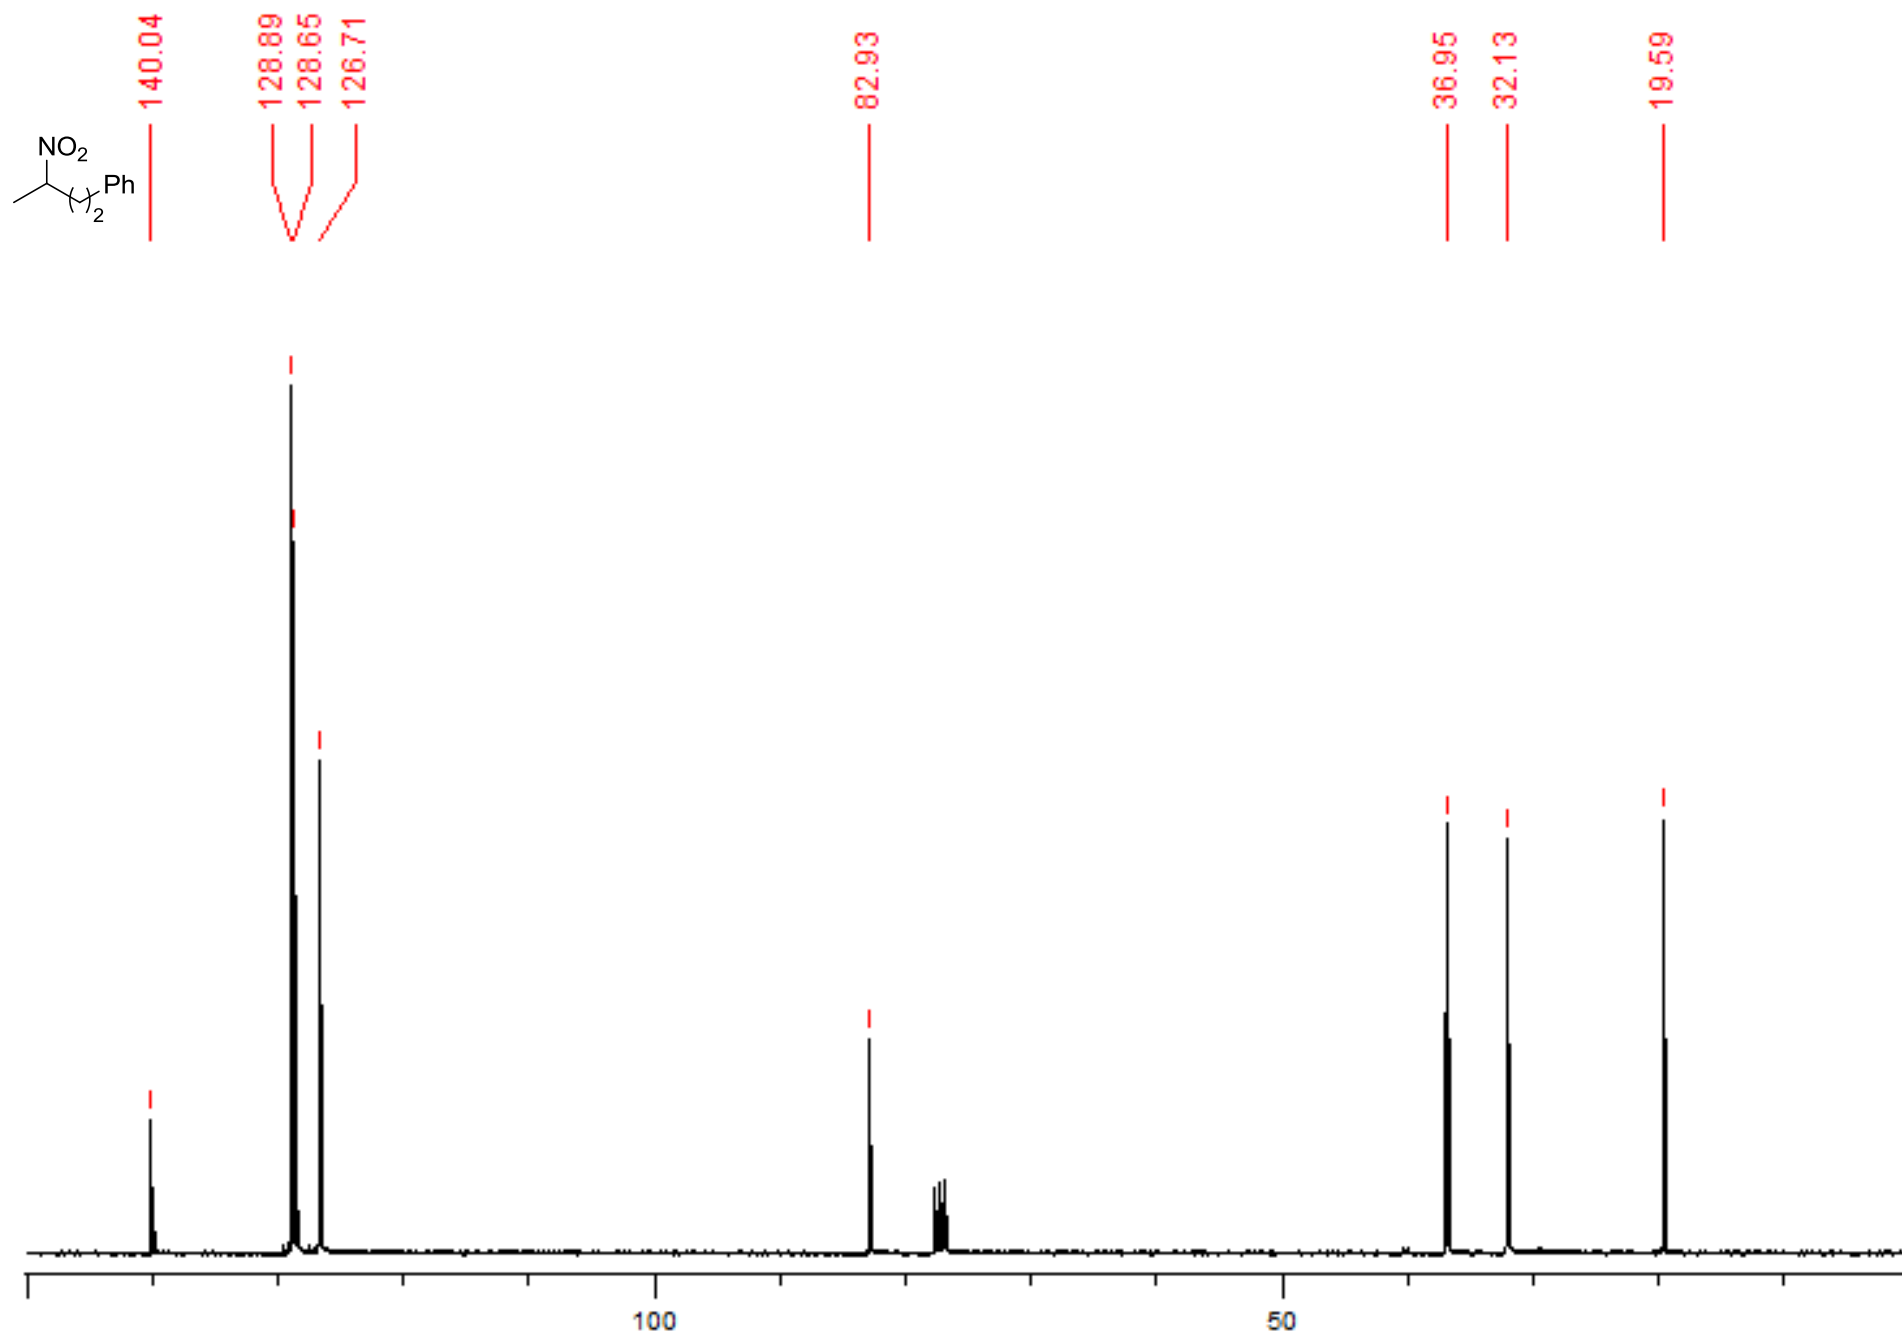

$^1\text{H}$  NMR - Compound **2m**.

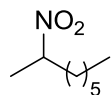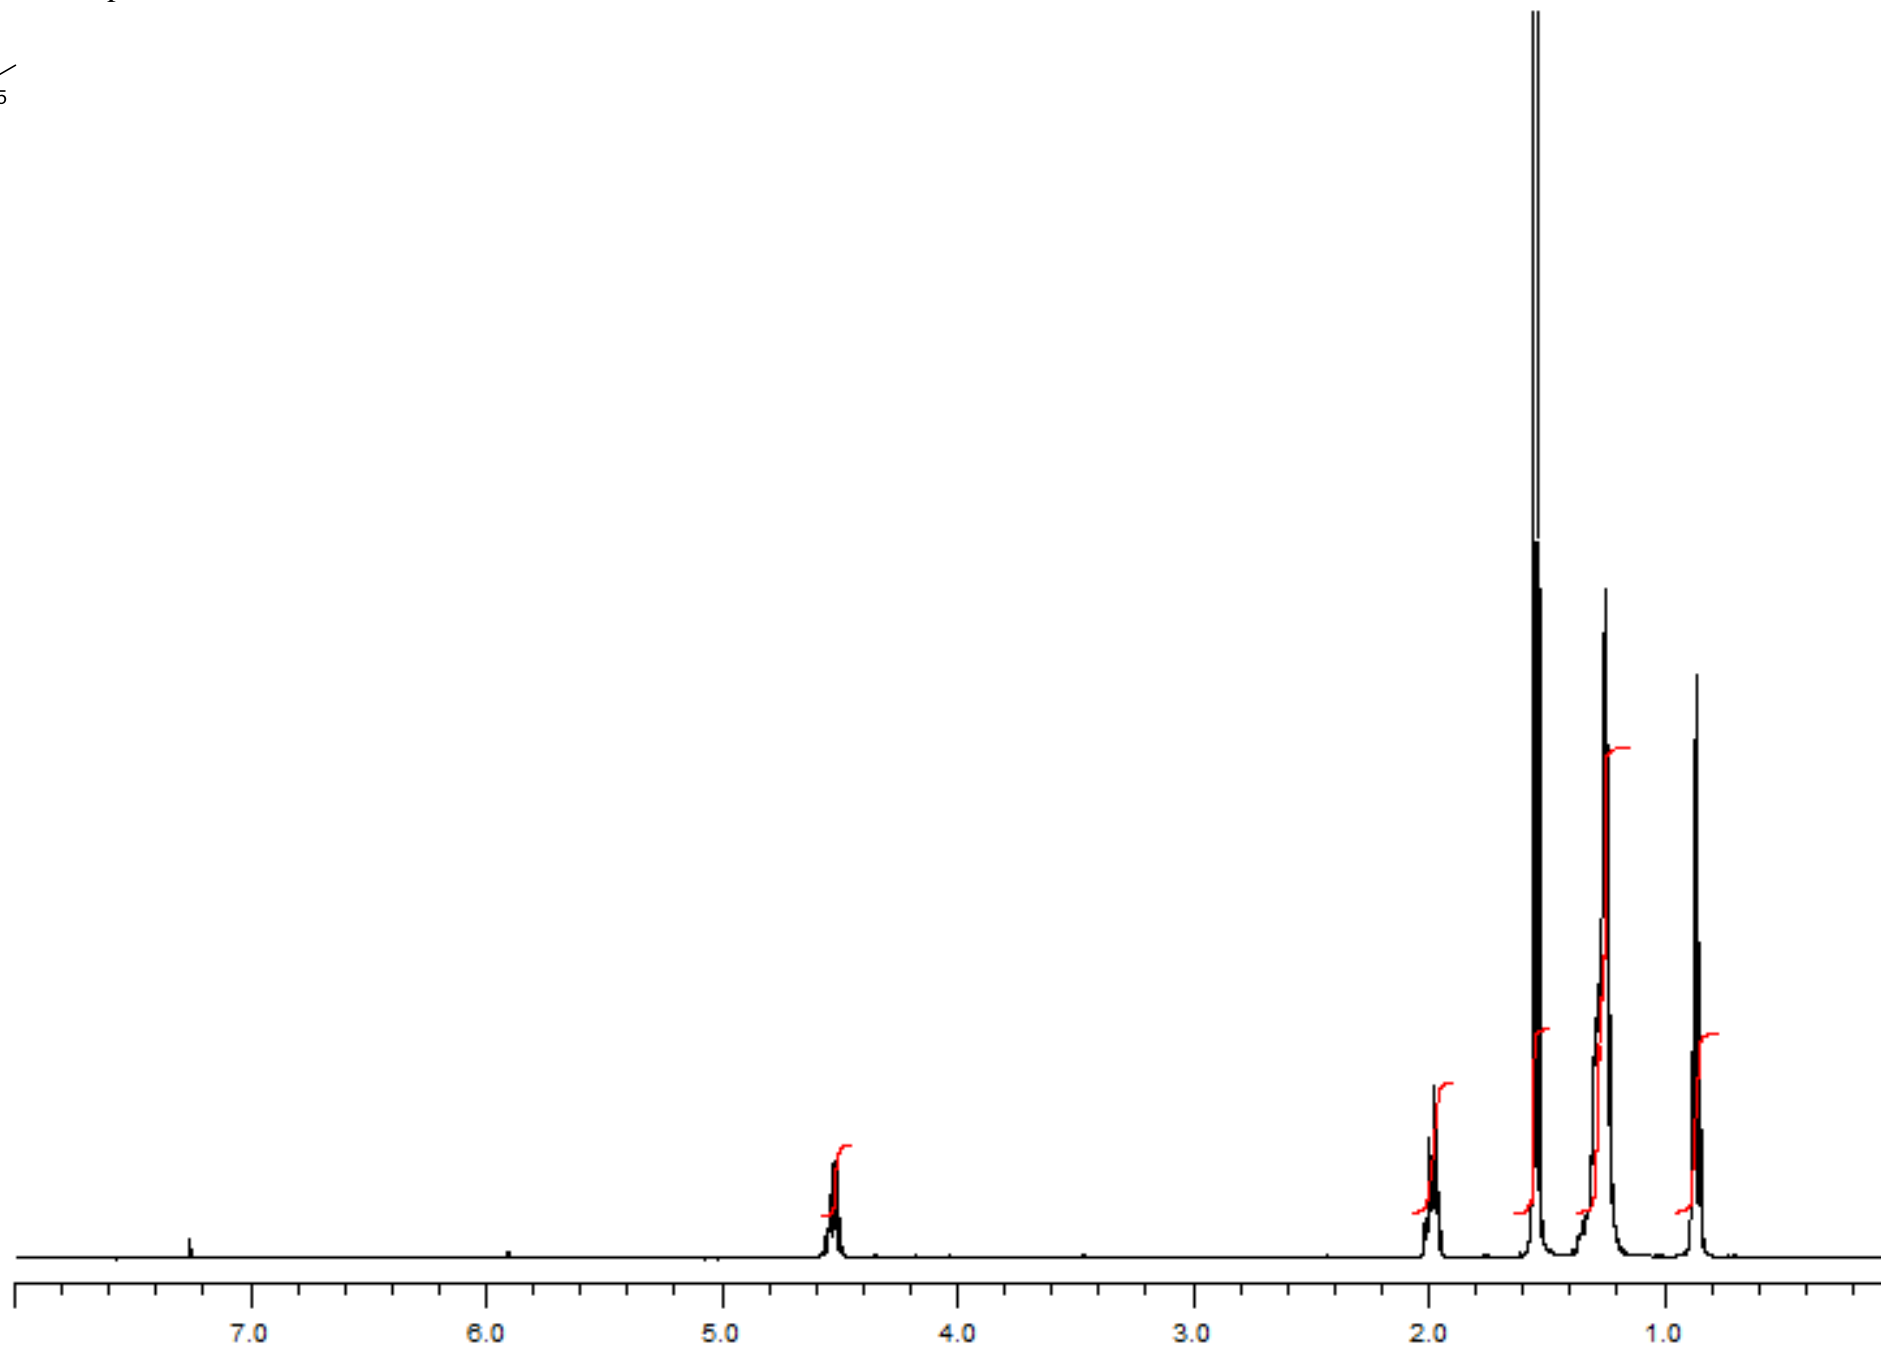

CC(C)CCCCCCCCC(C)C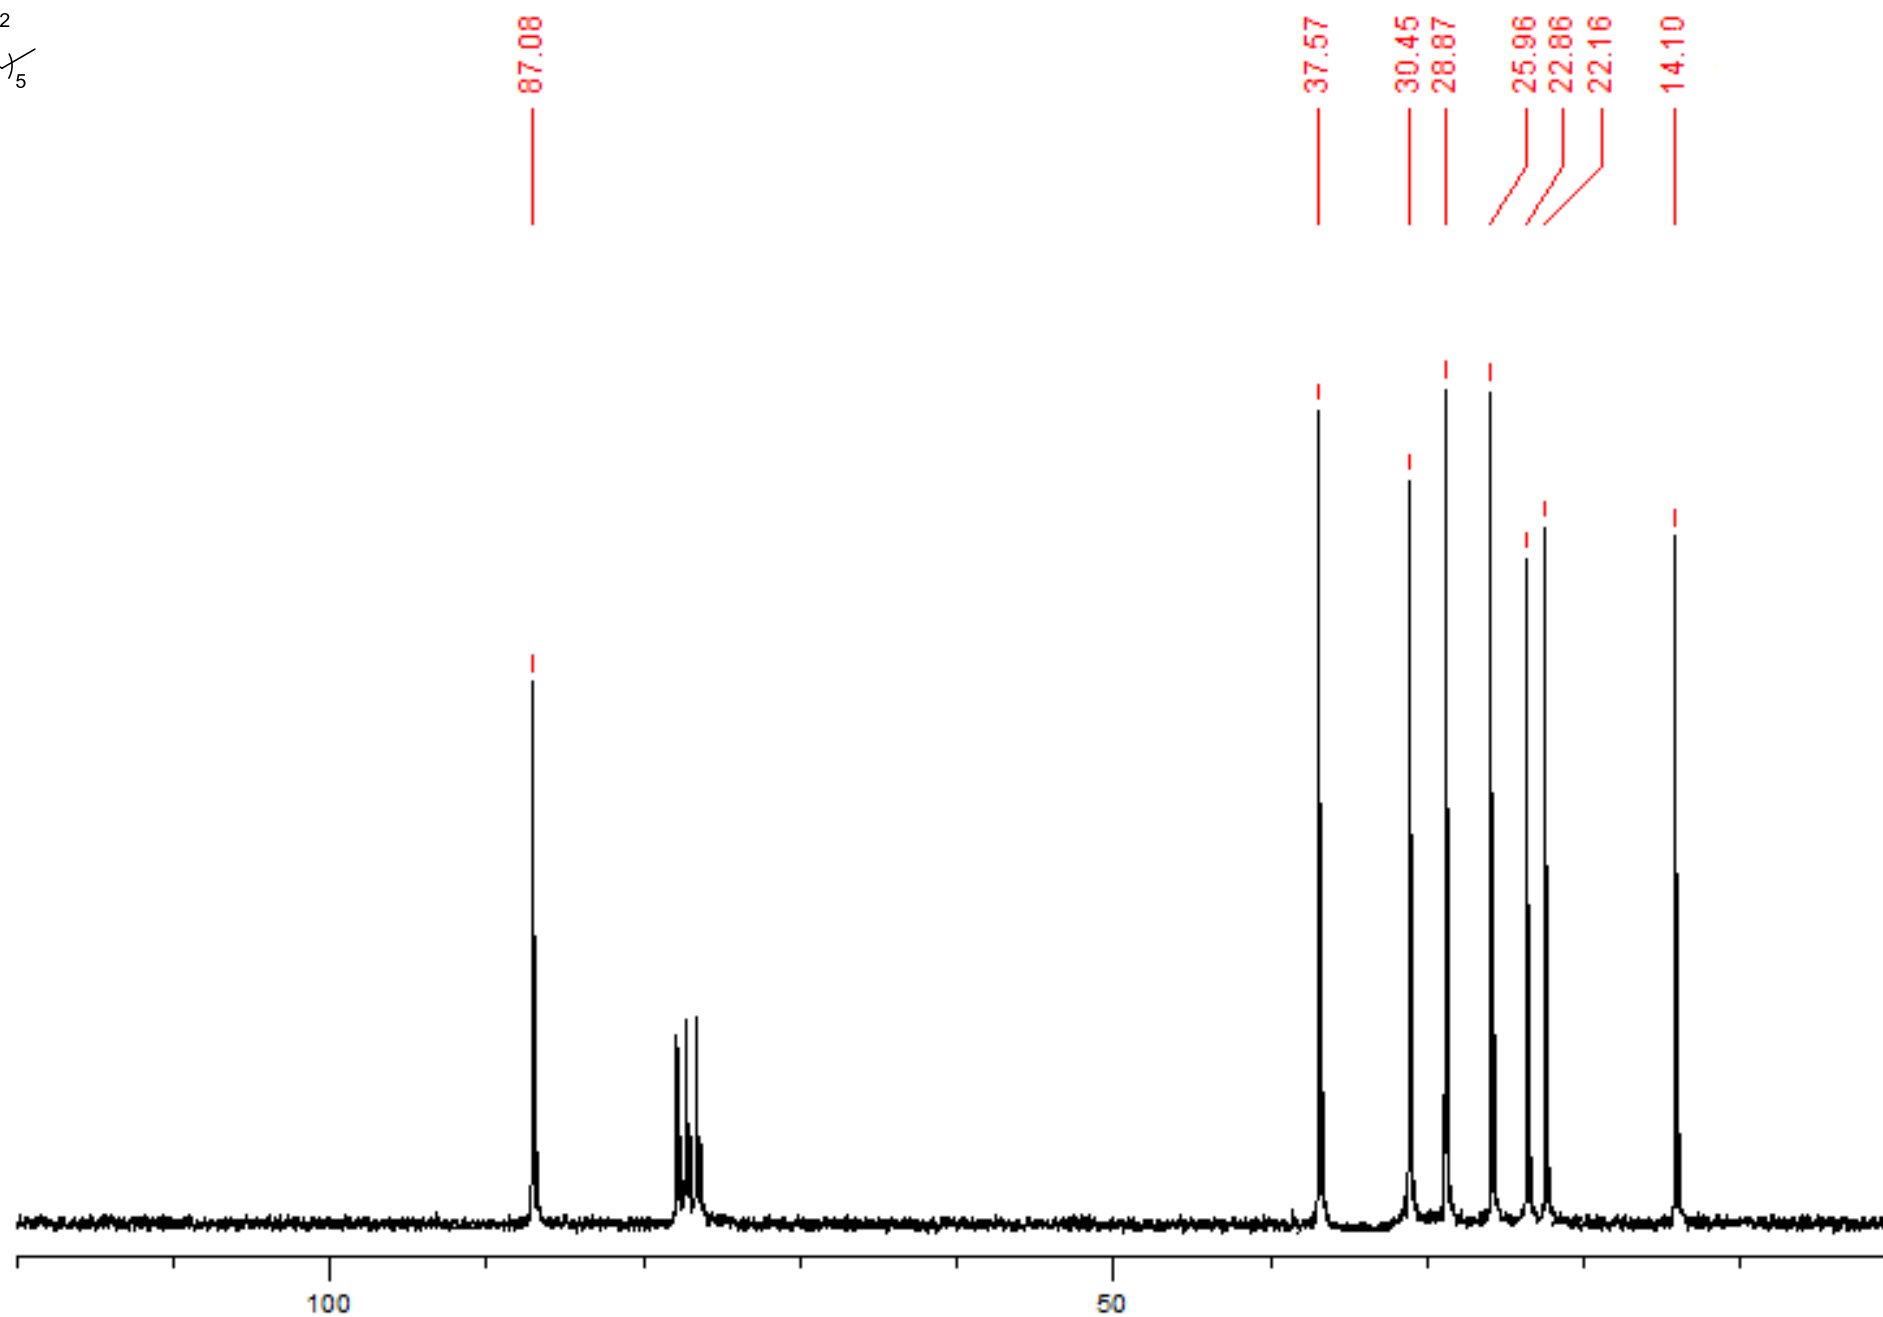

$^1\text{H}$  NMR - Compound **2n**.

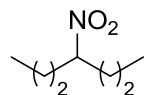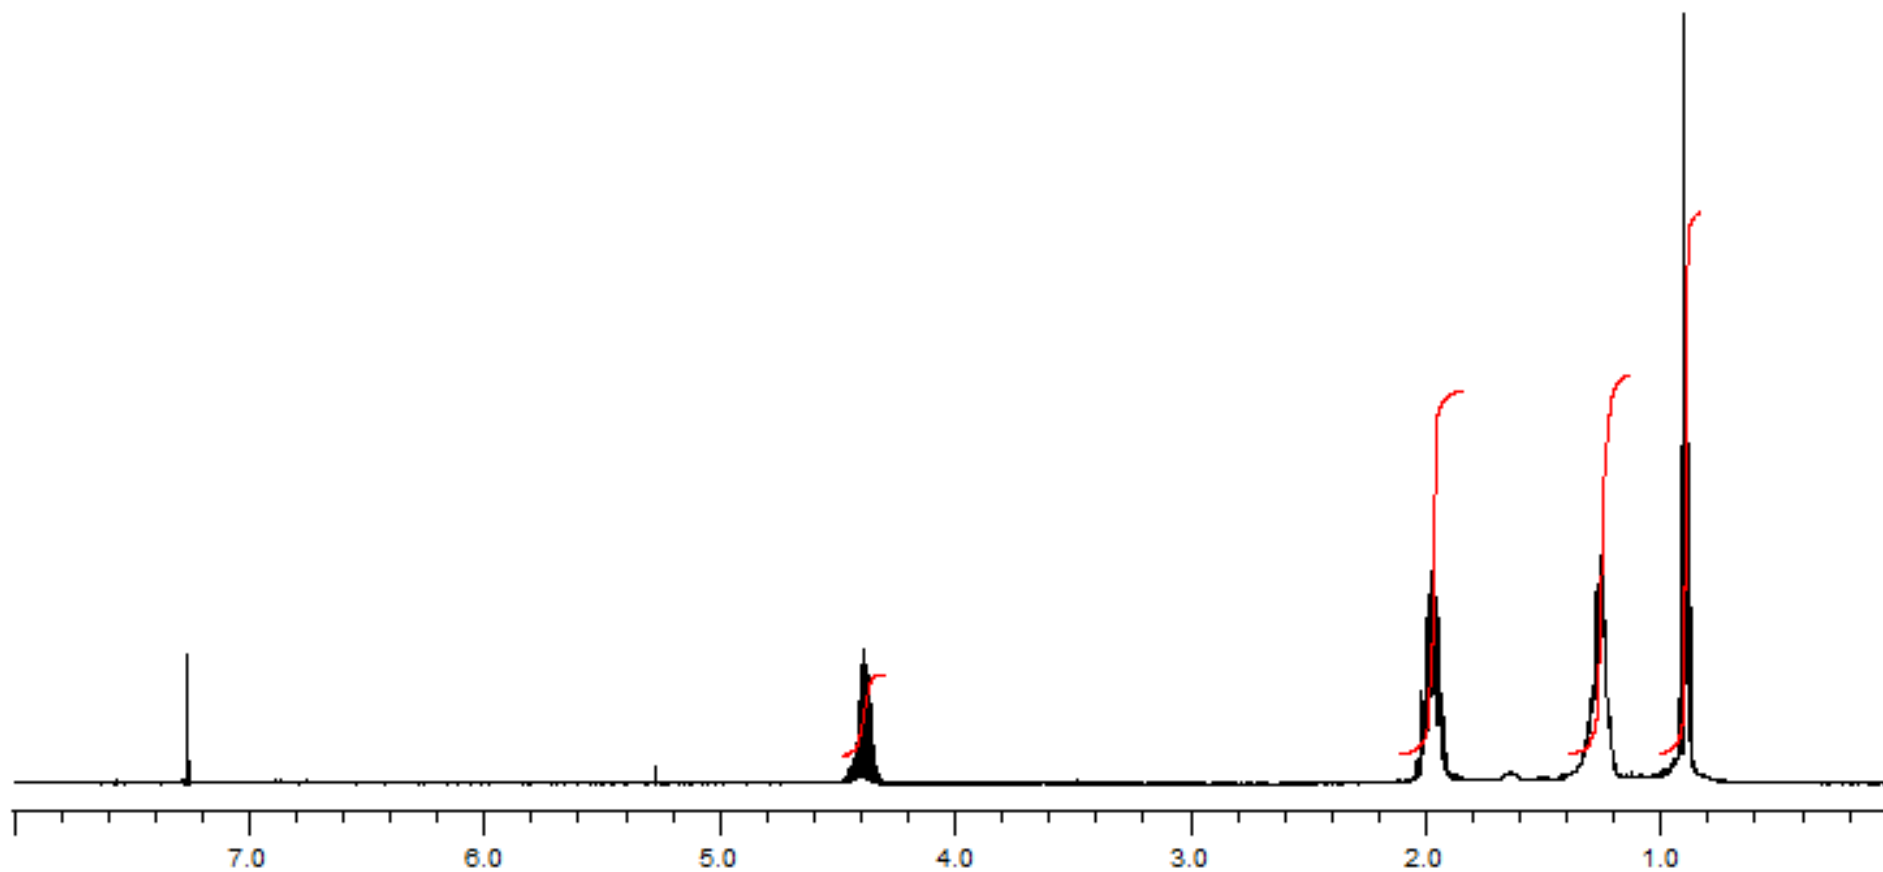

$^{13}\text{C}$  NMR - Compound **2n**.

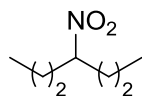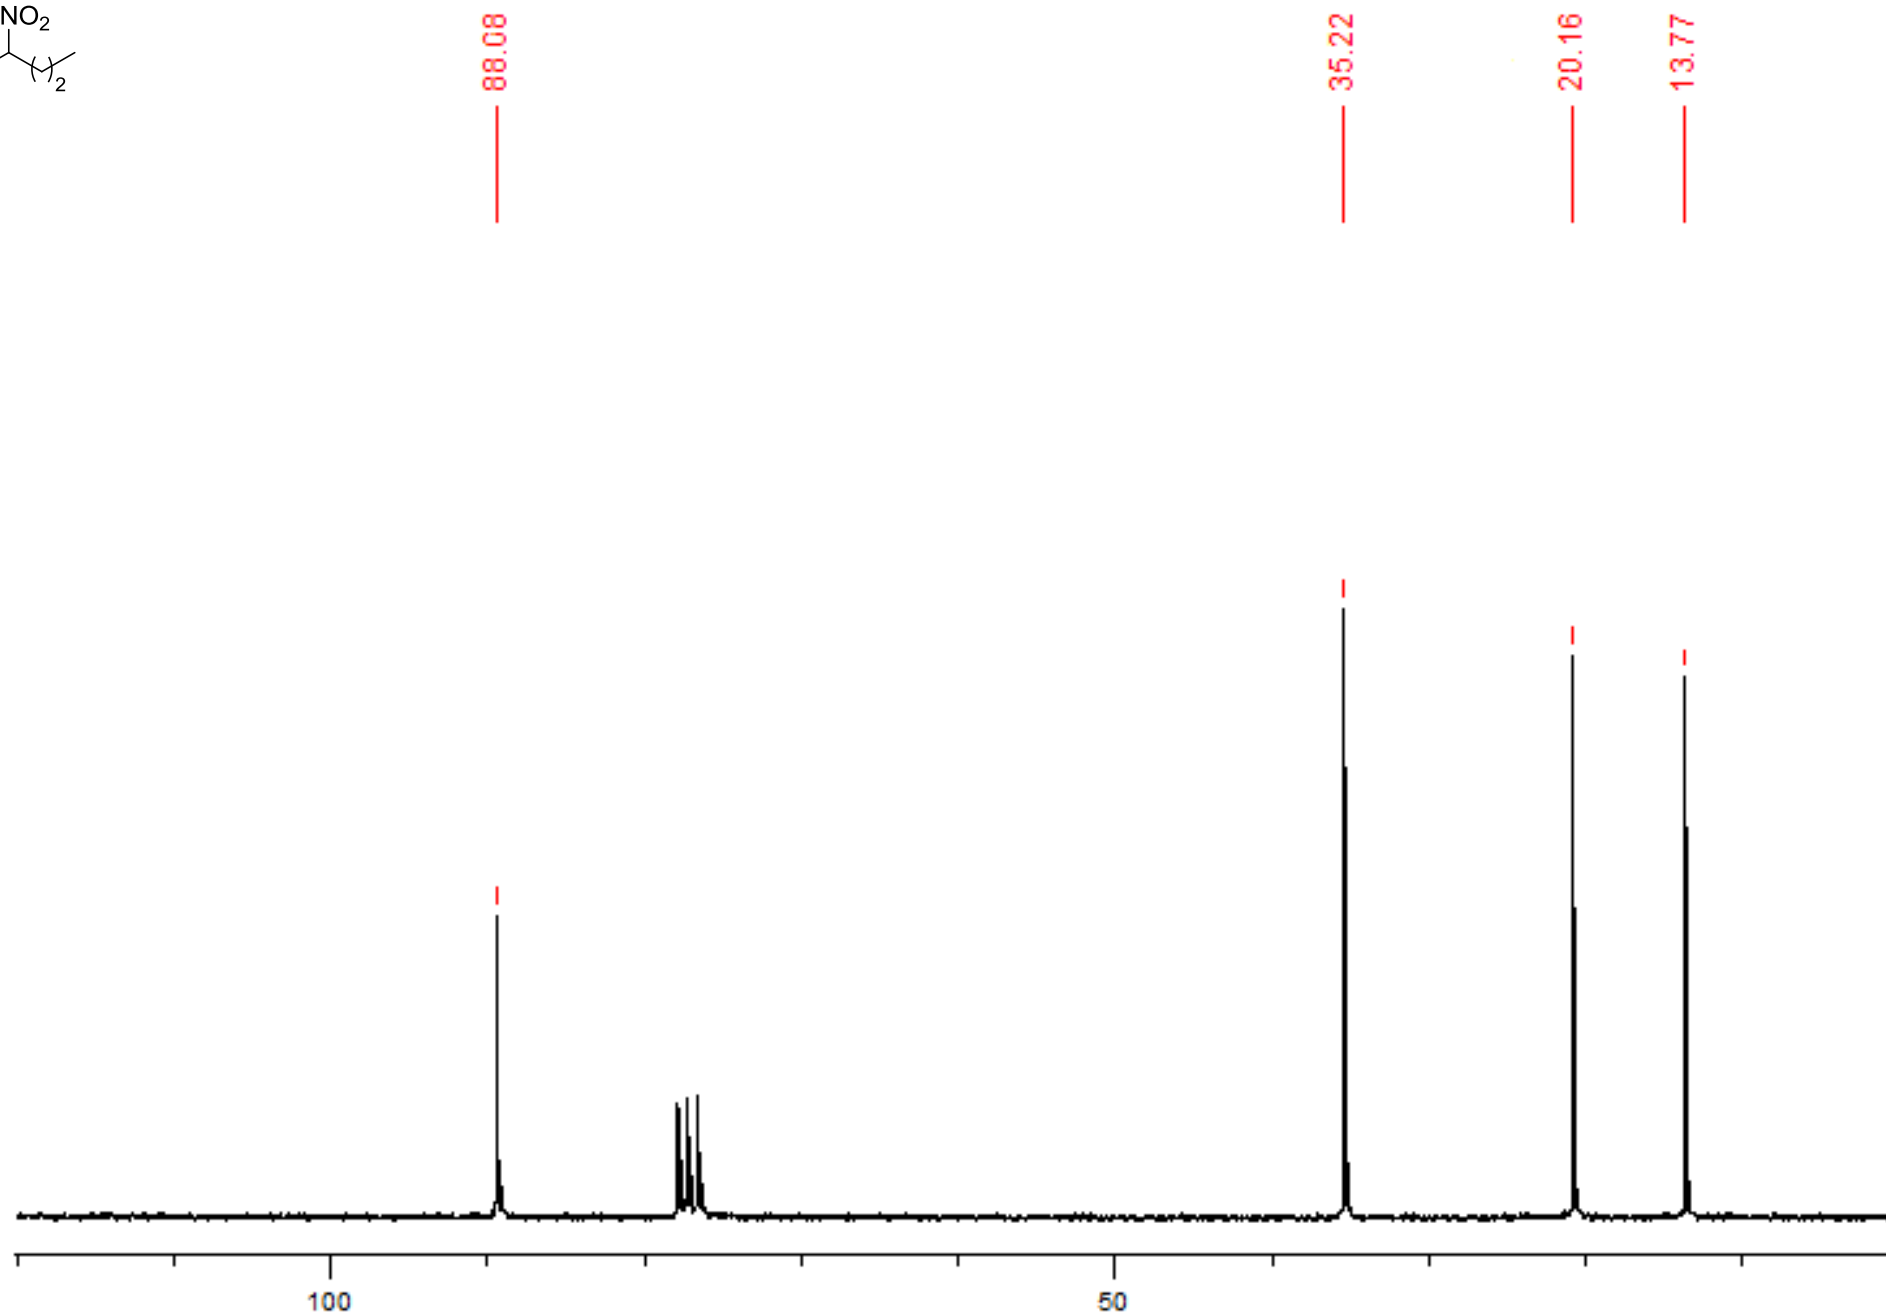

Supplement: Additional file 2 [file 1860-5397-9-58-S2.pdf]
